# Supplementary material for: Identification of QTL-allele systems of seed size and oil content for simultaneous genomic improvement in Northeast China soybeans
Source: Front Plant Sci. 2024 Nov 14;15:1483995. doi: 10.3389/fpls.2024.1483995 (PMC11602309; doi:10.3389/fpls.2024.1483995)
Supplement: Supplementary file 2 [file Table2.xlsx]

## Sheet: Data Sheet S1
Data Sheet S1. Summary of the maturity group of 361 soybean accessions
ID	Name	Maturity group	NJAU	100SW(g)	SOC(%)	Gm01_17738048	Gm01_18083704	Gm01_BLOCK_39719863_39752334	Gm01_45469815	Gm01_53359897	Gm02_5834794	Gm02_12540482	Gm02_BLOCK_13721101_13737254	Gm02_15613873	Gm02_19518514	Gm02_BLOCK_23178890_23211938	Gm02_23960254	Gm02_BLOCK_33127066_33140987	Gm02_BLOCK_36735281_36934976	Gm02_BLOCK_48382122_48391378	Gm02_50652540	Gm03_BLOCK_14699738_14752188	Gm03_15467787	Gm03_BLOCK_16035237_16035286	Gm03_BLOCK_18922646_19094931	Gm03_BLOCK_40883791_40983710	Gm04_BLOCK_1589459_1605811	Gm04_BLOCK_3959848_3999358	Gm04_BLOCK_7173325_7349829	Gm04_BLOCK_9622583_9649077	Gm04_9903141	Gm04_22829878	Gm04_23851723	Gm04_26561037	Gm04_27993724	Gm04_BLOCK_43821525_43868385	Gm05_1282	Gm05_2558192	Gm05_15751165	Gm05_BLOCK_27603689_27803518	Gm05_32544883	Gm05_33761407	Gm05_35789875	Gm06_1086623	Gm06_BLOCK_4187478_4265060	Gm06_BLOCK_15569110_15713936	Gm06_25148440	Gm06_BLOCK_31084754_31225436	Gm06_BLOCK_32166254_32180510
F1	Dong Nong 42	MGI	N29233	18.46	22.09	A	C	1	G	G	T	A	3	T	T	1	G	1	1	1	A	2	T	1	1	1	1	2	3	1	C	A	A	G	C	1	G	C	T	1	A	T	A	C	2	1	G	1	2
F2	Dong Nong 47	MG0	N29232	19.91	23.05	A	C	1	G	G	T	A	1	T	T	2	G	2	2	1	A	2	T	1	1	2	1	1	3	1	C	A	A	G	C	1	G	C	T	2	A	T	A	C	2	2	G	5	4
F3	Dong Nong 48	MG0	N29175	22.55	21.53	A	C	1	G	G	T	A	2	T	T	1	G	1	1	1	A	1	T	1	1	1	1	1	1	1	C	A	A	G	C	1	G	C	T	1	A	G	A	C	1	3	G	1	2
F4	Dong Nong 49	MG00	N29020	19.19	23.56	A	C	1	G	G	T	A	1	T	T	2	G	2	3	1	A	1	T	1	1	1	1	1	1	1	C	A	A	G	C	1	G	C	T	1	A	T	A	A	1	2	G	1	1
F5	Dong Nong 50	MG0	N29132	13.17	20.41	A	C	2	G	G	T	A	1	T	T	3	G	2	3	1	A	1	T	1	1	2	3	4	2	4	C	A	A	G	C	1	G	C	T	3	A	T	A	C	2	1	G	1	5
F6	Dong Nong 52	MGI	N29221	17.01	21.19	A	C	2	G	G	T	A	1	T	T	1	G	1	1	1	A	1	T	1	1	1	1	1	1	1	C	A	A	G	C	1	G	C	T	1	A	T	A	C	2	1	G	1	1
F7	Dong Nong 53	MG0	N29270	17.23	21.03	A	C	1	G	G	T	A	2	G	T	1	A	1	1	1	A	3	T	1	1	1	1	1	3	1	C	A	A	G	C	1	G	C	C	2	A	T	A	C	1	1	G	1	1
F8	Dong Nong 54	MGI	N29210	18.33	23.3	A	C	2	G	G	T	A	1	T	T	1	G	1	8	1	A	1	T	1	1	1	1	1	1	1	C	A	A	G	C	1	G	C	T	3	A	T	A	C	2	1	G	1	1
F9	Dong Da 1	MG000	N29002	18.79	22.15	A	C	1	G	G	T	A	1	T	T	1	G	2	2	1	A	1	T	1	1	5	1	1	1	1	C	A	A	G	C	1	G	C	T	2	A	T	A	C	2	1	G	1	1
F10	Kang Xian 5	MGI	N29157	19.5	22.55	A	C	1	G	G	T	G	1	T	T	1	G	1	1	2	A	1	T	1	1	1	1	1	1	1	C	A	A	G	C	3	G	C	T	1	A	T	A	C	1	2	G	1	1
F11	Hei Nong 3	MG0	N29163	17.24	22.2	A	C	1	G	G	T	A	1	T	T	1	G	1	2	1	A	2	T	1	1	1	1	2	2	1	C	A	A	G	C	1	G	C	T	1	A	T	A	C	1	2	G	2	3
F13	Hei Nong 37	MGI	N29268	17.77	22.19	A	C	1	G	G	T	A	1	T	T	1	G	1	1	1	A	1	T	1	1	1	1	3	2	1	C	A	A	G	C	1	C	C	T	1	A	T	A	C	1	1	G	2	4
F14	Hei Nong 47	MGI	N29234	17.18	22.14	A	C	2	G	G	T	A	1	T	T	1	G	1	1	1	A	3	T	1	1	1	1	4	3	1	C	A	A	G	C	1	G	C	T	3	A	T	T	C	2	1	G	4	3
F15	Hei Nong 48	MG0	N29243	20.3	22.41	A	C	1	G	G	T	A	1	T	T	1	G	1	1	1	A	2	T	1	1	1	1	1	3	1	C	A	A	G	C	1	G	C	T	1	A	T	A	C	2	3	G	1	2
F16	Hei Nong 51	MGI	N29288	16.24	22.35	A	C	1	G	G	T	A	1	T	T	1	G	1	1	1	A	1	T	1	1	1	1	3	1	1	C	A	A	G	C	1	G	C	T	1	A	T	A	C	1	3	G	1	2
F17	Hei Nong 52	MGI	N29273	17.36	22.54	A	C	1	G	G	T	A	1	T	T	1	G	1	1	1	A	1	T	1	1	1	1	1	1	1	C	A	A	G	C	1	G	C	T	1	A	T	A	C	1	2	G	1	2
F18	Hei Nong 53	MGI	N29235	18.69	22.74	A	C	2	G	G	T	A	1	T	T	1	G	1	1	1	A	1	T	1	1	1	1	4	3	1	C	A	A	G	C	1	G	C	T	1	A	T	T	C	2	2	G	1	1
F19	Hei Nong 54	MGI	N29242	19.38	22.85	A	C	2	G	G	T	A	1	T	T	1	G	1	1	1	A	2	T	1	1	1	1	1	3	1	C	A	A	G	C	1	G	C	T	1	A	T	T	C	2	3	G	1	2
F20	Hei Nong 57	MG0	N29193	21.21	23.79	A	C	1	G	G	T	A	3	T	T	1	G	1	1	2	A	1	T	1	1	2	1	1	6	1	C	A	A	G	C	1	G	C	T	1	A	T	A	C	2	3	G	1	1
F21	Hei Nong 58	MGI	N29267	18.89	22.93	A	C	1	G	G	T	A	1	T	T	1	G	1	1	1	A	1	T	1	1	1	1	3	1	1	C	A	A	G	C	1	G	C	T	1	A	T	A	C	1	1	G	2	3
F22	Hei Nong 61	MGI	N29245	21.2	23.6	A	C	1	G	G	T	A	3	T	T	1	G	1	1	1	A	1	T	1	1	1	1	1	3	1	C	A	A	G	C	1	G	C	T	1	A	T	A	C	2	1	G	4	4
F23	Hei Nong 62	MGI	N29280	20.36	23.54	A	C	1	G	G	T	A	3	T	T	1	G	1	1	1	A	1	T	1	1	1	1	2	2	1	C	A	A	G	C	1	G	C	T	1	A	T	A	C	1	3	G	1	1
F25	Hei He 24	MG00	N29024	22.18	22.24	A	C	2	G	G	T	A	1	T	T	1	G	2	2	1	A	3	T	1	1	2	1	1	1	1	C	A	A	C	C	1	G	C	T	1	A	T	A	C	1	3	G	1	1
F26	Hei He 38	MG00	N29027	18.76	22.65	A	C	2	G	G	T	A	1	T	T	1	G	1	7	1	A	1	T	1	1	1	1	1	3	1	C	A	A	G	C	2	G	C	T	1	A	T	A	C	2	6	G	1	1
F27	Hei He 40	MG000	N29009	19.73	23.3	A	C	1	G	G	T	A	1	T	T	1	G	2	2	1	A	3	T	1	1	2	1	1	1	1	C	A	A	G	C	1	G	C	T	1	A	T	A	C	2	3	G	1	1
F28	Hei He 45	MG00	N29034	21.56	23.41	A	T	1	G	G	T	A	1	T	T	1	G	1	1	1	A	1	T	1	1	1	1	1	1	1	C	A	A	G	C	1	G	C	T	1	A	T	A	C	1	2	G	1	1
F29	Hei He 50	MG00	N29021	21.98	23.48	A	C	2	G	G	T	A	1	T	T	1	G	2	2	1	A	1	T	1	1	1	1	3	1	1	C	A	A	G	C	1	G	C	T	2	A	T	A	C	3	2	G	1	1
F30	Hei He 51	MG0	N29089	16.99	22.61	A	C	1	G	G	T	A	1	T	T	1	G	2	2	1	A	3	T	1	1	1	1	1	1	1	C	A	A	G	C	1	G	T	T	1	A	T	A	C	2	1	G	1	1
F31	Hei He 52	MG00	N29025	20.24	23.48	A	C	1	G	G	T	A	1	T	T	1	G	1	1	1	A	3	T	1	1	2	1	1	1	1	C	A	A	G	C	1	G	C	T	1	A	T	A	A	2	3	G	1	1
F32	Hei He 53	MG0	N29073	20.94	24.31	A	C	2	G	G	T	A	1	T	T	2	G	1	1	1	A	3	T	1	1	2	1	1	1	1	C	A	A	G	C	1	G	C	T	1	A	T	A	C	1	2	G	1	1
F34	Tie Feng 22	MGIII	N29356	17.88	21.83	A	C	1	G	G	T	A	2	T	T	3	G	2	3	1	A	1	T	1	1	5	1	1	2	1	C	A	A	G	C	3	G	C	T	3	A	T	A	C	4	2	G	1	5
F35	Tie Feng 24	MGIII	N29357	20.78	20.98	A	C	1	G	G	T	A	3	T	T	1	G	1	1	1	A	3	T	1	1	5	1	1	2	1	C	A	A	G	C	3	G	C	C	1	A	T	T	C	1	5	G	1	5
F36	Tie Feng 34	MGIII	N29360	23.41	20.89	A	C	1	G	G	T	A	1	T	T	3	G	2	4	1	A	3	T	1	1	1	1	4	1	3	A	A	A	G	C	1	G	C	T	1	A	T	T	C	1	2	G	1	5
F37	Tie Dou 39	MGIII	N29361	22.54	21.29	A	C	1	G	G	T	A	1	T	T	1	G	2	4	1	A	3	T	1	1	4	1	1	2	3	A	A	A	G	C	1	G	C	T	1	A	T	T	C	1	2	G	1	5
F38	Tie Dou 42	MGI	N29256	20.68	22.46	A	C	2	G	G	T	A	1	T	T	3	G	2	4	1	C	3	T	1	1	1	1	1	2	3	A	A	A	G	C	1	G	C	T	3	A	T	T	C	4	2	G	1	5
F39	He Feng 5	MG0	N29131	16.31	21.55	A	C	1	G	G	T	A	1	T	T	1	G	1	5	1	A	2	T	2	1	3	1	1	2	1	C	A	A	C	A	3	G	T	T	1	A	T	A	C	1	2	G	4	3
F43	He Feng 25	MG0	N29111	19.63	21.26	A	C	1	G	G	T	A	1	T	T	1	A	1	1	1	A	3	T	1	1	2	1	1	4	1	C	A	A	G	C	1	G	C	T	1	A	T	A	C	1	3	G	1	2
F44	He Feng 26	MG0	N29093	13.7	22.28	A	C	1	G	C	T	A	2	T	T	1	G	1	1	1	A	1	T	1	1	1	1	1	1	1	C	A	A	G	C	1	G	C	T	1	A	T	A	C	1	3	G	1	2
F45	He Feng 35	MG0	N29106	21.49	22.83	A	C	1	G	G	T	A	2	G	T	4	G	1	1	1	A	1	T	1	1	1	1	1	1	1	C	A	A	G	C	1	G	C	T	1	A	T	A	C	1	3	G	1	2
F46	He Feng 39	MG0	N29103	17.93	22.78	A	C	1	G	G	T	A	2	T	T	1	G	1	1	1	A	3	T	1	1	1	1	1	3	1	C	A	A	G	C	1	G	C	T	2	A	T	A	C	1	1	G	1	1
F48	He Feng 48	MGI	N29241	18.36	22.44	A	C	2	G	G	T	A	1	T	T	1	G	1	8	2	A	1	T	1	1	2	1	1	1	1	C	A	A	G	C	1	G	C	T	1	A	T	T	C	1	1	G	1	1
F49	He Feng 50	MG0	N29177	20.45	23.06	A	C	1	G	G	T	G	2	T	T	1	A	1	1	2	A	1	T	1	1	1	1	1	3	1	C	A	A	G	C	1	G	C	T	2	A	T	A	A	1	1	G	1	2
F50	He Feng 51	MG0	N29105	17.09	22.39	A	C	1	G	G	T	A	1	T	T	1	A	1	1	2	A	3	T	1	1	1	1	1	3	1	C	A	A	G	C	1	G	C	T	2	A	T	A	C	1	1	G	1	1
F51	He Feng 55	MG0	N29168	19.19	22.28	A	C	1	G	G	T	A	1	T	T	1	G	1	1	1	A	3	T	1	1	2	1	1	1	1	C	A	A	G	C	1	G	C	T	1	A	T	T	C	1	1	G	1	1
F53	Meng Dou 10	MG0	N29070	20.58	24.19	A	C	1	G	G	T	A	2	T	T	1	G	1	1	1	A	3	T	1	1	3	1	1	1	1	C	A	A	G	C	1	G	C	T	1	A	T	A	C	1	4	A	1	1
F54	Meng Dou 11	MG000	N29006	16.93	20.6	A	C	1	G	G	T	A	1	T	T	2	G	2	2	1	A	2	T	1	1	2	1	1	3	1	C	A	A	G	C	1	G	C	T	2	A	T	A	C	2	2	G	5	3
F55	Meng Dou 12	MG0	N29065	18.78	23.6	A	C	1	G	G	T	A	2	T	T	1	G	1	1	1	A	1	T	1	1	1	1	1	3	1	C	A	A	G	C	1	G	C	T	1	A	T	A	C	1	6	G	1	1
F56	Meng Dou 14	MG0	N29074	17.03	23.41	A	C	1	G	G	T	A	1	T	T	1	G	1	1	1	A	2	T	1	1	2	1	2	3	1	C	A	A	G	C	1	G	C	T	2	A	T	T	C	1	3	G	1	1
F57	Meng Dou 16	MG00	N29041	22.68	21.51	A	C	2	G	G	T	A	1	T	T	2	G	2	2	2	A	1	T	1	1	2	1	1	3	1	C	A	A	G	C	1	G	C	T	2	A	G	T	C	1	1	G	1	1
F58	Meng Dou 19	MG000	N29013	23.84	22.6	A	C	1	G	G	T	A	1	T	T	1	G	1	1	1	A	1	T	1	1	1	1	1	1	1	C	A	A	G	C	1	G	C	T	2	A	T	A	C	1	2	G	1	1
F59	Meng Dou 26	MG00	N29029	18.98	23.51	A	C	2	G	G	T	A	1	T	T	2	G	2	2	1	A	1	T	1	1	2	1	1	2	1	C	A	A	G	C	1	G	T	T	1	A	T	A	C	2	3	G	1	1
F60	Meng Dou 28	MG0	N29066	19	23.33	A	C	1	G	G	T	A	1	T	T	2	G	2	2	2	A	2	T	1	1	2	1	2	3	1	C	A	A	G	C	1	G	C	T	2	A	T	T	C	3	2	G	1	2
F61	Meng Dou 30	MG0	N29128	22.6	21.76	A	C	1	G	G	T	A	1	T	T	1	G	2	3	1	A	1	T	1	1	2	1	1	3	1	C	A	A	G	C	1	G	C	T	1	A	T	A	C	3	2	G	1	1
F62	Liao Dou 14	MGIII	N29348	16.39	21.8	A	C	1	G	G	T	A	1	T	T	1	G	1	1	1	A	1	T	1	1	1	1	1	1	1	C	A	A	C	C	1	G	C	T	2	A	T	A	C	1	1	G	1	2
F63	Liao Dou 20	MGIII	N29351	22.01	21.13	A	C	1	G	G	T	G	2	T	T	1	G	1	1	1	A	1	T	1	1	4	1	1	2	1	A	A	A	G	C	1	G	C	T	3	A	T	A	C	2	4	G	1	1
F64	Liao Dou 22	MGIII	N29352	19.37	21.82	A	C	2	G	G	T	A	1	T	T	1	G	2	2	1	A	3	T	1	1	2	2	2	1	1	C	A	A	G	C	1	G	C	T	1	A	T	T	C	4	4	G	3	1
F65	Liao Dou 23	MGIII	N29353	20.2	20.04	A	C	2	G	G	T	A	1	T	T	2	G	2	2	1	A	3	T	1	1	2	2	2	1	4	A	A	A	G	C	1	G	C	T	3	A	T	T	C	2	4	G	1	1
F66	Liao Dou 24	MGIII	N29354	17.73	21.56	A	C	2	G	G	T	A	1	T	T	1	G	1	8	2	A	1	T	1	1	3	1	1	2	1	C	A	A	G	C	1	G	C	T	3	C	T	T	C	2	3	G	1	5
F67	Liao Dou 26	MGIII	N29355	25.16	21	A	C	2	G	G	T	A	1	T	T	1	G	2	6	1	A	3	T	1	1	3	2	2	1	1	C	A	A	G	C	1	G	C	T	1	A	T	T	C	4	4	G	5	4
F68	Feng Shou 21	MG0	N29064	18.39	23.33	A	C	2	G	G	T	G	1	T	T	2	G	2	2	1	A	4	T	1	1	5	1	1	1	1	A	A	A	G	C	1	G	C	T	3	A	T	T	C	1	2	G	1	5
F69	Feng Shou 25	MG0	N29055	19.95	23.39	A	C	1	G	G	T	A	2	T	T	1	G	1	7	1	A	1	T	1	1	2	1	3	3	1	C	A	A	G	C	1	G	T	T	1	A	T	A	C	1	3	G	6	3
F70	Ke 4430-20	MG0	N29062	21.53	22.04	A	C	1	G	G	T	A	1	T	T	1	G	1	1	1	A	1	T	1	1	2	1	2	1	1	C	A	A	G	C	1	G	C	T	1	A	T	A	C	1	2	G	1	2
F73	Man Cang Jin	MGI	N29310	16.54	21.43	A	C	3	G	G	T	A	2	T	T	2	A	2	2	1	A	2	T	1	1	3	1	1	2	1	C	A	A	G	C	1	G	C	T	3	A	T	A	C	1	1	G	1	1
F74	Zi Hua 4	MGI	N29292	17.45	21.35	A	C	1	G	G	T	A	2	T	T	3	G	1	7	1	A	2	T	1	1	3	1	1	1	1	C	A	A	G	C	1	G	T	T	1	A	T	A	C	1	2	G	5	3
F75	Yuan Bao Jin	MG0	N29139	16.24	22.74	A	C	1	G	G	T	A	2	T	T	3	G	2	4	1	A	3	T	1	2	2	1	1	1	1	C	A	A	G	C	2	G	C	T	1	A	T	A	C	2	2	A	2	3
F76	Feng Di Huang	MGII	N29343	18.4	20.36	A	C	2	G	G	T	A	2	T	T	1	G	1	5	1	A	1	T	1	1	5	1	1	1	1	C	A	A	G	C	1	G	C	T	1	A	T	A	C	1	2	G	1	1
F77	Si Li Huang	MG0	N29203	19.93	22.33	A	C	1	G	G	T	A	1	T	T	1	G	2	1	1	A	1	T	1	1	2	1	1	1	1	C	A	A	G	C	1	G	C	T	2	A	T	T	C	2	1	G	1	1
F78	Tie Jia Si Li Huang	MGII	N29309	14.5	19.9	A	C	1	G	C	T	A	1	T	T	2	G	2	2	1	A	1	T	1	1	3	1	1	1	1	C	A	A	G	C	1	G	T	T	2	A	T	A	C	1	2	G	2	3
F79	Shi Sheng Chang Ye	MG0	N29095	21.04	24.33	A	C	1	G	G	T	A	1	T	T	4	G	1	1	1	A	1	T	1	1	4	1	1	2	1	C	A	A	G	C	2	G	C	T	1	A	T	A	C	1	1	G	1	2
F80	Clark63	MG0	N29142	21.16	22.4	A	C	1	G	G	T	A	1	T	T	1	A	1	8	2	A	1	T	1	1	1	3	4	3	1	C	A	A	G	C	1	G	C	T	1	A	T	A	C	2	4	G	1	5
F81	Amsoy	MG0	N29126	17.91	21.88	A	C	1	G	G	T	G	1	T	T	1	G	1	1	2	A	3	T	1	1	3	1	1	2	1	C	A	A	G	C	1	G	C	T	1	A	T	A	C	2	3	G	1	1
F82	Beeson	MG0	N29109	16.53	24.73	A	C	2	G	G	T	A	1	T	T	2	G	2	2	1	A	3	T	1	3	2	1	1	1	1	C	A	A	G	C	1	G	C	T	2	A	T	T	C	2	4	G	1	1
F83	CN210	MG0	N29104	15.89	23.96	A	C	2	G	G	T	G	1	T	T	1	G	2	6	2	A	1	T	1	3	1	2	1	2	1	A	A	A	G	C	1	G	C	T	1	A	T	A	C	2	3	G	1	5
F84	Mu Feng 2	MG0	N29137	16	23.23	A	C	2	G	G	T	G	2	T	T	3	G	2	1	2	A	1	T	1	1	2	2	1	1	1	C	A	A	G	C	1	G	C	T	1	A	T	A	C	2	3	G	1	5
F85	Ken Nong 18	MG0	N29098	17.58	23.43	A	C	1	G	G	T	A	1	T	T	1	G	1	5	1	A	2	T	1	1	3	1	1	2	1	C	A	A	G	C	3	G	T	T	1	A	T	A	C	1	2	G	4	3
F86	Ken Nong 19	MGI	N29143	21.35	21.4	A	C	1	G	G	T	A	1	T	T	2	G	2	2	1	A	1	T	1	1	3	1	4	3	1	C	A	A	G	C	1	G	C	T	2	A	T	T	C	2	2	G	1	1
F87	Ken Nong 22	MGI	N29216	19.65	21.78	A	C	1	G	G	T	A	1	T	T	2	G	2	1	1	A	1	T	1	1	2	1	1	1	1	C	A	A	G	C	4	G	C	T	1	A	T	A	C	2	4	G	1	2
F88	Bei Dou 3	MG0	N29075	16.68	23.25	A	C	1	G	G	T	A	2	T	T	1	G	1	1	2	A	1	T	1	1	1	1	1	2	1	C	A	A	G	C	1	G	C	T	1	A	T	A	C	1	1	G	1	1
F89	Bei Dou 9	MG0	N29067	19.36	23.43	A	C	2	G	G	T	A	2	T	T	1	G	1	1	1	A	1	T	1	1	1	1	1	1	1	C	A	A	G	C	4	G	C	T	2	A	T	A	C	3	2	G	1	2
F90	Bei Dou 10	MG0	N29117	18.9	22.19	A	C	2	G	G	T	A	1	T	T	2	G	2	2	1	A	1	T	1	1	1	2	3	1	1	C	A	A	G	C	1	G	C	T	2	A	T	A	C	1	2	G	1	1
F91	Ji Lin 35	MGI	N29262	15.65	22.53	A	C	1	G	G	T	A	1	T	T	1	G	2	2	1	A	1	T	1	1	1	1	1	1	1	C	A	A	G	C	1	G	C	T	1	A	T	A	C	1	3	G	1	1
F92	Ji Lin 39	MGII	N29284	18.29	22.33	A	C	1	G	G	T	A	1	T	T	1	A	2	2	2	A	1	T	1	3	3	1	1	1	1	C	A	A	G	C	1	G	C	T	3	A	T	A	C	1	1	G	1	1
F93	Ji Lin 44	MGII	N29263	16.99	22.94	A	C	2	G	G	T	A	1	T	T	2	G	2	2	1	A	3	T	1	1	3	1	1	1	1	C	A	A	G	C	1	G	C	T	3	A	T	A	C	1	1	G	1	1
F94	Ji Yu 67	MG0	N29254	17.41	22.15	A	C	1	G	G	T	A	3	T	C	3	G	2	4	1	A	3	T	1	1	6	3	4	3	3	C	A	A	G	C	1	G	C	T	3	A	T	T	C	2	2	G	1	2
F95	Ji Yu 72	MGI	N29269	15.86	21.31	A	C	1	G	G	T	A	1	T	T	2	G	2	2	1	A	2	T	1	1	2	1	1	3	1	C	A	A	G	C	1	G	C	T	1	A	T	A	C	2	2	G	3	3
F96	Ji Yu 73	MGI	N29281	15.5	23.79	A	C	1	T	G	T	A	1	T	T	1	G	2	2	1	A	1	T	1	1	1	1	1	3	1	C	A	A	G	C	5	G	C	T	1	A	T	A	C	1	4	G	1	2
F97	Ji Yu 84	MGI	N29258	17	22.85	A	C	1	G	C	A	A	2	T	T	1	G	1	1	1	A	1	T	1	1	5	1	1	1	1	C	A	A	G	C	1	G	C	T	1	A	T	T	A	1	2	G	1	2
F98	Ji Yu 87	MGI	N29228	15.21	23.35	A	C	1	G	G	T	A	2	T	T	1	G	1	1	1	A	1	T	1	1	5	1	1	1	1	C	A	A	G	C	1	G	C	T	1	A	T	A	C	1	1	G	1	1
F99	Ji Yu 88	MGII	N29324	15.63	21.25	A	C	1	G	G	T	A	2	T	T	1	G	1	1	2	A	1	T	1	1	5	1	1	1	1	C	A	A	G	A	1	G	C	T	1	C	T	T	C	1	2	G	1	1
F100	Ji Yu 89	MGI	N29303	14.74	23.58	A	C	1	G	G	T	A	1	T	T	2	G	2	2	2	A	1	T	1	1	1	2	4	3	1	C	A	A	G	C	1	G	C	T	3	A	T	A	C	2	2	G	1	2
F101	Ji Yu 90	MGII	N29331	18.04	22.71	A	C	2	G	G	T	A	1	T	T	1	G	1	1	1	A	1	T	1	1	4	1	1	2	1	A	A	A	G	C	1	G	C	T	2	A	T	A	C	2	3	G	1	1
F102	Ji Yu 91	MGII	N29325	17.01	20.36	A	C	1	G	G	T	A	1	T	T	1	G	2	2	1	A	1	T	1	1	3	1	1	1	1	C	A	A	G	C	1	G	C	T	3	A	T	A	C	4	4	G	1	1
F103	Ji Yu 92	MGII	N29290	17.26	21.88	A	C	1	G	G	T	A	2	T	T	1	G	1	1	1	A	1	T	1	1	3	2	1	2	2	C	A	A	G	C	1	G	C	T	1	A	T	A	C	2	2	G	1	2
F104	Ji Yu 93	MGII	N29320	15.9	22.25	A	C	3	G	G	T	G	1	T	T	1	G	1	1	1	A	1	T	1	1	3	1	1	1	1	C	A	A	G	C	1	G	C	T	2	A	T	T	A	2	4	G	1	1
F105	Ji Yu 101	MGII	N29321	9.09	20.95	A	C	1	G	G	T	A	1	T	T	1	G	1	1	1	A	1	T	1	1	3	1	5	2	1	C	A	A	G	C	1	G	C	T	1	A	T	A	C	2	3	G	1	1
F106	Chang Nong 13	MGII	N29295	16.09	22.41	A	C	1	G	G	T	A	3	T	T	2	G	2	5	1	A	1	T	1	1	5	3	4	1	1	C	A	A	G	C	2	G	C	T	1	A	T	A	C	2	2	G	1	2
F107	Chang Nong 14	MGI	N29318	15.26	21.51	C	C	2	G	G	T	A	2	T	T	1	G	1	1	1	A	3	T	1	1	3	1	1	1	1	C	A	A	G	C	1	G	C	T	1	A	T	A	C	4	1	G	1	2
F108	Chang Nong 18	MGIII	N29330	17.36	22.14	A	C	1	G	G	T	A	2	T	T	1	G	1	1	1	A	1	T	1	1	3	1	1	1	1	C	A	A	G	C	1	G	C	T	2	A	T	A	C	2	1	G	1	2
F109	Chang Nong 19	MGII	N29285	17.29	24	A	C	1	G	G	T	G	2	T	C	4	G	1	1	2	A	1	T	1	1	3	1	1	1	2	C	A	A	G	C	1	G	C	T	1	A	T	A	C	1	1	G	1	2
F110	Chang Nong 20	MGI	N29264	13.75	23.2	A	C	1	G	G	T	A	1	T	T	2	G	2	2	2	A	1	T	1	1	3	1	2	1	1	C	A	A	G	C	1	G	C	T	1	C	T	T	C	4	1	G	1	2
F111	Chang Nong 21	MGII	N29278	15.98	23.56	A	C	1	G	G	T	A	3	G	T	2	G	2	2	1	A	2	T	1	1	2	1	2	1	1	C	A	A	G	C	1	G	C	T	2	A	T	A	C	1	1	G	1	2
F112	Chang Nong 22	MGII	N29339	15.51	20.53	A	C	1	G	G	T	A	1	T	T	1	G	2	3	2	A	1	T	1	1	3	1	2	1	1	C	A	A	G	C	1	G	C	T	1	A	T	T	C	4	1	G	1	2
F113	Chang Nong 23	MGII	N29306	15.8	22.2	A	C	1	G	G	T	A	1	T	T	2	G	2	2	1	A	1	T	1	1	3	2	1	2	1	C	A	A	G	C	1	G	C	T	1	A	T	A	C	2	4	G	1	1
F114	Chang Nong 24	MGI	N29211	17.43	22.1	A	C	2	G	G	T	A	2	T	T	1	G	1	1	1	A	3	T	1	1	3	1	1	1	1	C	A	A	G	C	1	G	C	T	1	A	T	A	C	4	1	G	1	2
F115	Tong Nong 4	MGII	N29299	16.58	20.71	A	C	1	G	G	T	A	2	T	T	1	G	1	1	1	A	3	T	1	1	1	1	3	2	1	C	C	A	G	C	1	G	C	T	2	A	T	A	C	1	1	G	3	3
F116	Ken Feng 10	MGI	N29217	18.74	22.73	A	C	2	G	G	T	A	1	T	T	1	G	1	1	1	A	3	T	1	1	2	1	2	4	1	C	A	A	G	C	1	G	C	T	1	A	T	A	C	1	3	G	1	2
F117	Ken Feng 14	MG0	N29140	20.75	20.8	A	C	1	G	G	T	A	1	T	T	1	G	2	3	1	A	1	T	1	1	2	1	1	1	1	C	A	A	G	C	1	G	C	T	2	A	T	T	C	1	2	G	1	2
F118	Ken Feng 15	MGI	N29185	18.71	23.66	A	C	2	G	G	T	A	1	T	T	2	G	2	2	2	A	1	T	1	1	3	1	1	1	1	C	A	A	G	C	1	G	C	T	2	A	T	T	C	3	1	G	1	1
F119	Ken Feng 16	MGI	N29218	15.98	22.36	A	C	1	G	G	T	A	1	T	T	1	G	1	1	1	A	1	T	1	1	1	1	1	1	1	C	A	A	G	C	1	G	C	T	1	A	T	A	C	1	4	G	1	1
F120	Ken Feng 17	MG0	N29208	18.36	23.51	A	C	1	G	G	A	A	2	T	T	1	G	1	1	2	A	1	T	1	1	1	1	1	3	1	C	A	A	G	C	1	G	C	T	1	A	T	A	C	2	2	G	1	2
F121	Ken Feng 18	MGI	N29249	19.54	22.75	A	C	1	G	G	T	A	2	T	T	1	G	1	1	2	A	1	T	1	1	1	1	1	1	1	C	A	A	G	C	3	G	C	T	2	A	T	A	C	1	1	G	1	2
F122	Ken Feng 19	MG0	N29102	18.03	22.01	A	C	1	G	G	T	A	1	T	T	1	G	1	1	1	A	3	T	1	1	1	1	1	3	1	C	A	A	G	C	1	G	C	T	2	A	T	A	C	1	1	G	1	1
F123	Ken Feng 21	MG00	N29049	15.96	23.25	A	C	2	G	G	T	A	2	T	T	1	G	1	1	1	A	1	T	1	1	2	1	1	1	1	C	A	A	G	C	1	G	C	T	1	A	T	A	C	1	5	G	1	5
F124	Ken Feng 23	MGI	N29181	16.54	22.13	A	C	2	G	G	T	A	1	T	T	2	G	2	2	1	A	1	T	1	1	2	1	1	1	1	C	A	A	G	C	1	G	C	T	2	A	T	A	C	1	1	G	1	1
F125	Ken Dou 25	MG0	N29146	16.86	22.61	A	C	1	G	G	T	A	2	T	T	1	G	1	1	1	A	1	T	1	1	1	1	1	1	1	C	A	A	G	C	1	G	C	T	1	A	T	A	C	1	1	G	1	1
F126	Ken Dou 26	MGI	N29222	16.6	22.51	A	C	1	G	G	T	A	1	T	T	1	G	1	1	1	A	1	T	1	1	1	1	1	2	1	C	A	A	G	C	5	G	C	T	2	A	T	A	C	1	1	G	1	2
F127	Ken Dou 27	MG0	N29147	19.84	23.28	A	C	1	G	G	T	A	2	T	T	1	G	1	1	2	A	2	T	1	1	4	1	1	3	1	C	A	A	G	C	1	G	C	T	1	A	T	A	C	1	3	G	1	2
F128	Ken Dou 28	MGI	N29244	17.3	22.71	A	C	1	G	G	T	A	1	T	T	1	G	1	1	2	A	2	T	1	1	4	1	1	3	1	C	A	C	G	C	1	G	C	T	1	A	T	A	C	2	1	G	1	1
F129	Bei Dou 18	MG0	N29123	16.84	23.68	A	C	1	G	G	T	A	2	T	T	4	G	1	1	1	A	2	T	1	1	1	1	1	1	1	C	A	A	G	C	1	G	C	T	1	A	T	A	C	1	1	G	1	2
F130	Bei Dou 20	MG00	N29047	20.89	23.66	A	C	1	G	G	T	A	2	G	T	2	G	2	1	2	A	2	T	1	1	1	1	1	2	1	C	A	A	G	C	1	G	C	T	2	A	T	A	C	1	1	G	1	2
F131	Bei Dou 30	MG0	N29071	20.96	22.33	A	C	1	G	G	T	A	1	T	T	1	G	1	1	1	A	1	T	1	2	1	1	1	1	1	C	A	A	G	C	2	G	C	T	1	A	T	A	C	1	2	G	1	1
F133	Nen Feng 14	MG0	N29164	19.19	21.85	A	C	1	G	G	T	A	1	T	T	1	G	1	1	1	A	2	T	1	1	4	1	1	1	1	C	A	A	G	C	1	G	C	T	1	A	T	A	C	2	2	G	1	2
F134	Nen Feng 15	MG0	N29260	18.16	21.83	A	C	1	G	G	T	A	1	T	T	3	G	2	4	1	A	1	T	1	1	5	2	3	1	1	C	A	A	G	A	1	G	C	T	1	A	T	A	C	1	2	G	2	4
F135	Nen Feng 17	MG0	N29138	16.78	24.43	A	C	1	G	G	T	A	1	T	T	3	G	2	1	1	A	2	T	1	1	2	2	1	1	1	C	A	A	G	C	1	G	C	T	1	A	T	A	C	1	2	G	1	1
F136	Nen Feng 18	MG0	N29149	16.54	23.58	A	C	1	G	G	T	G	2	T	T	3	G	2	4	1	A	1	T	1	1	5	2	3	1	1	C	A	A	G	C	1	G	C	T	1	A	T	A	C	1	2	G	3	3
F137	Nen Feng 19	MG0	N29180	18.51	23.35	A	C	1	G	G	T	A	1	T	T	1	G	1	7	1	A	1	T	1	1	2	1	1	2	1	C	A	A	G	C	1	G	C	T	1	A	T	A	C	2	2	G	4	3
F138	Ji Nong 9	MGII	N29340	18.28	22.26	A	C	2	G	G	T	A	1	T	T	1	G	1	7	1	A	1	T	1	1	2	1	1	2	1	C	A	A	G	C	1	G	T	T	1	A	T	A	C	2	2	G	5	4
F139	Ji Nong 22	MGIII	N29345	16.06	20.59	A	C	1	G	G	T	A	1	T	T	1	G	1	1	2	A	1	T	1	1	3	1	1	2	1	C	A	A	G	C	1	G	C	T	3	A	T	A	C	1	1	G	1	2
F140	Bei Dou 14	MG00	N29037	18.29	23.88	A	C	1	G	G	T	A	2	T	T	2	G	2	6	2	A	2	T	1	1	3	1	1	2	1	C	A	A	G	C	1	G	C	T	3	A	T	A	C	1	4	G	1	1
F141	Bei Dou 16	MG000	N29017	18.1	23.79	A	C	1	G	G	T	A	1	T	T	1	G	1	1	1	A	1	T	1	1	1	1	1	1	1	C	A	A	G	C	1	G	C	T	2	A	T	A	C	1	2	G	1	1
F142	Bei Dou 21	MG0	N29174	16.68	21.76	A	C	2	G	G	T	A	1	T	T	2	G	2	2	1	A	1	T	1	1	1	2	3	1	1	C	A	A	G	C	1	G	C	T	2	A	T	A	C	1	2	G	1	1
F143	Bei Dou 22	MG00	N29190	19.29	23.1	A	C	2	G	G	T	A	1	T	T	1	G	2	2	1	A	1	T	1	1	2	2	1	1	1	C	A	A	G	C	1	C	C	T	2	A	T	A	C	1	2	G	1	1
F144	Bei Dou 23	MG00	N29033	18.68	23.51	A	C	1	G	G	T	A	1	T	T	2	G	2	3	1	A	1	T	1	1	1	1	1	1	1	C	A	A	G	C	1	G	C	T	2	A	T	A	C	2	2	G	1	1
F145	Bei Dou 24	MG000	N29022	19.11	23.69	A	C	2	G	G	T	A	1	T	T	1	G	2	3	1	A	6	T	1	1	2	1	1	1	1	C	A	A	G	C	1	G	C	T	1	A	T	A	C	1	2	G	1	1
F147	Bei Ken 9395	MG0	N29101	23.93	22.16	A	C	2	G	G	A	A	1	T	T	1	G	2	3	1	A	1	T	1	1	2	1	1	1	1	C	A	A	G	C	1	G	C	T	1	A	T	A	C	1	3	G	1	1
F148	Hei Nong 6	MG00	N29063	18.54	24.05	A	C	1	G	G	A	A	1	T	T	1	G	1	1	1	A	3	T	1	1	2	1	2	1	1	C	A	A	G	C	1	G	C	T	1	A	T	A	C	2	1	G	4	3
F152	Feng Shou 11	MG000	N29015	20.35	21.9	A	C	1	G	G	T	A	1	T	T	2	G	2	2	1	A	1	T	1	1	2	2	3	1	1	C	A	A	G	C	1	G	T	T	2	A	T	A	C	1	2	G	3	4
F154	He Feng 22	MG0	N29084	19.76	22.68	A	C	1	G	G	T	A	2	G	T	2	G	2	2	1	A	1	T	1	2	7	1	3	1	1	C	A	A	G	C	1	G	C	T	1	A	T	A	C	2	2	A	1	1
F155	Mu Feng 1	MG0	N29118	19.31	24.28	A	C	1	G	G	T	A	1	T	T	1	G	1	7	1	A	1	T	1	1	5	1	1	1	1	C	A	A	G	C	1	G	T	T	1	A	T	A	C	1	2	G	3	4
F157	Nen Feng 1	MG0	N29148	18.34	21.75	A	C	1	G	G	T	A	2	T	T	3	G	2	4	1	A	2	T	1	1	3	1	2	1	1	C	A	A	G	C	1	G	C	T	1	A	T	A	C	1	1	G	4	4
F158	Nen Feng 7	MG0	N29192	18.81	23.41	A	C	1	G	G	T	A	2	T	T	3	G	2	4	1	A	2	T	1	1	3	1	2	1	1	C	A	A	C	C	1	G	C	T	1	A	T	A	C	1	1	G	3	4
F162	Qun Xuan 1	MG0	N29188	16.75	22.68	A	C	2	G	G	T	G	3	T	T	1	G	1	1	1	A	3	T	1	1	4	1	1	2	1	C	A	A	G	C	1	G	C	T	3	A	T	A	C	1	2	G	1	2
F165	He Feng 23	MG0	N29124	20.08	22.39	A	C	1	G	G	T	A	1	T	T	1	G	1	5	1	A	2	T	1	1	3	1	1	1	1	C	A	A	G	C	1	G	T	T	1	A	T	A	C	1	2	G	3	4
F166	Bei Feng 3	MG00	N29007	21.33	22.34	A	C	1	G	G	T	A	1	T	T	1	G	1	1	1	A	1	T	1	1	2	1	1	4	1	C	A	A	G	C	1	G	C	T	1	A	T	A	C	1	3	G	1	2
F167	Jiu Feng 2	MG00	N29019	16.29	21.71	A	C	1	G	G	T	A	1	T	T	2	G	2	2	1	A	3	T	1	1	3	1	1	2	1	C	A	A	G	C	1	G	C	T	1	A	T	A	C	1	1	G	1	1
F168	Hong Feng 2	MG0	N29173	18.54	23.98	A	C	2	G	G	T	A	1	T	T	1	G	1	1	1	A	3	T	2	1	2	1	1	1	1	C	A	A	G	C	1	G	T	T	2	A	T	A	C	1	1	G	1	1
F169	Hong Feng 3	MG00	N29030	19	23.61	A	C	1	G	G	T	A	1	T	T	1	G	2	2	1	A	2	T	1	1	2	1	1	1	1	C	A	A	G	C	2	G	C	T	1	A	T	T	C	1	1	G	1	1
F170	Sui Nong 5	MG0	N29134	15.74	22	A	C	1	G	G	T	A	1	T	T	1	G	2	2	1	A	2	T	1	1	2	1	1	1	1	C	A	A	G	C	2	G	C	T	1	A	T	T	C	1	1	G	1	1
F174	Feng Shou 19	MG00	N29042	20.39	23.41	A	C	1	G	G	T	A	1	T	T	1	G	2	1	2	A	2	T	1	1	2	1	2	3	1	C	A	A	G	C	1	G	C	T	1	A	T	T	C	1	2	G	1	2
F175	Dong Nong 33	MGI	N29315	16.33	21.14	A	C	1	G	G	T	A	1	T	T	1	G	1	1	1	A	5	T	1	1	3	1	1	2	1	C	A	A	G	C	1	G	C	T	1	A	T	A	C	1	1	G	3	3
F177	Jiu Nong 12	MGI	N29283	19.36	21.49	A	C	1	G	G	T	A	1	T	T	1	A	1	1	2	A	1	T	1	1	3	1	1	1	1	C	A	A	G	C	1	G	C	T	1	A	T	A	C	1	1	G	1	2
F178	Jiu Nong 13	MGI	N29204	15.91	22.13	A	C	1	G	G	T	A	2	T	T	1	G	1	4	1	A	1	T	1	1	6	1	1	2	1	C	A	A	G	C	1	G	C	T	3	A	T	A	C	2	2	G	1	2
F179	Liao Dou 3	MGII	N29336	17.65	21.25	A	C	1	G	G	T	A	1	T	T	1	G	1	1	1	A	1	T	1	1	1	1	1	1	1	C	A	A	G	C	1	G	C	T	1	A	T	A	A	1	4	G	1	1
F181	Hei He 7	MG000	N29005	18.39	22.25	A	C	2	G	G	T	A	1	T	T	1	G	1	1	1	A	3	T	1	1	2	1	1	1	1	C	A	C	G	C	1	G	C	T	1	A	T	A	C	2	3	G	1	1
F182	Hei He 8	MG00	N29043	21.84	21.76	A	C	1	G	G	T	A	1	T	T	1	G	2	6	1	A	1	T	1	1	1	1	1	1	1	C	A	A	G	C	1	G	C	T	2	A	T	A	C	2	2	G	1	1
F184	Jiu Feng 4	MG00	N29059	16.33	22.24	A	C	1	G	G	T	A	1	T	T	1	G	1	1	1	A	1	T	1	1	4	1	1	1	1	C	A	A	G	C	1	G	C	T	1	A	T	A	C	1	6	G	1	1
F187	Mu Feng 6	MGI	N29179	19.28	22.76	A	C	1	G	G	T	A	1	T	T	1	G	2	2	1	A	4	T	1	1	4	1	1	2	1	C	A	A	G	C	1	G	C	T	1	A	T	A	C	2	1	G	1	1
F188	He Feng 29	MG00	N29060	17	22.43	A	C	1	G	G	T	G	1	T	T	1	G	1	1	2	A	3	T	1	1	1	1	1	2	1	C	A	A	G	C	1	G	C	T	1	A	T	A	C	2	3	G	1	1
F194	Hei Nong 34	MG0	N29170	19.48	21.88	A	C	1	G	G	T	A	3	T	T	1	G	1	1	2	A	2	T	1	1	2	1	2	6	1	C	A	A	G	C	1	G	C	T	2	A	T	A	C	2	3	G	1	1
F196	Dong Nong 37	MG0	N29287	18.78	21.14	A	C	1	G	G	T	A	3	T	T	1	G	1	1	2	A	2	T	1	1	2	1	2	1	1	C	A	C	G	C	1	G	C	T	2	A	T	A	C	2	3	G	1	1
F197	Dong Nong 38	MG00	N29068	20.05	22.51	A	C	2	G	G	T	A	3	T	T	2	G	2	2	1	A	2	T	1	1	2	1	1	1	1	C	A	A	G	C	1	C	C	T	2	A	T	T	C	1	4	G	1	1
F202	Tong Nong 9	MGII	N29323	16.74	20.83	A	C	1	G	G	T	A	1	T	T	1	G	1	1	1	A	1	T	1	1	1	1	1	1	1	C	A	A	G	C	1	G	C	T	1	A	T	A	C	1	5	G	1	2
F203	Hei Nong 39	MGI	N29266	15.53	22.63	C	C	1	G	G	T	A	2	T	C	3	G	2	4	1	A	1	T	1	1	4	1	1	2	1	C	A	A	G	C	2	G	C	T	3	A	T	T	C	2	5	G	3	3
F204	Ken Nong 4	MG0	N29167	21.3	21.03	A	C	2	G	G	T	A	1	T	T	2	G	2	2	2	A	2	T	1	1	1	1	4	3	1	C	A	A	G	C	1	G	C	T	3	A	T	T	C	2	1	G	1	1
F205	He Feng 33	MG0	N29186	17.29	23.14	A	C	1	G	G	T	A	3	T	T	1	G	1	4	2	A	1	T	1	1	4	1	1	3	2	C	A	A	G	C	3	C	C	T	1	A	T	A	C	1	2	G	3	4
F206	Hong Feng 8	MG0	N29121	16.56	23.64	A	C	1	G	G	T	A	1	T	T	3	G	2	1	1	A	1	T	1	1	1	1	1	2	1	C	A	A	G	C	1	G	T	T	2	A	T	A	C	2	2	G	1	1
F209	Dong Nong 43	MG000	N29038	18.71	21.81	A	C	1	G	G	T	A	1	T	T	2	G	2	2	1	A	1	T	1	1	3	1	1	2	1	C	A	A	G	C	1	G	C	T	1	A	T	T	C	1	2	G	1	1
F210	Hong Feng 12	MG0	N29054	16.86	22.6	A	C	1	G	G	T	A	2	T	T	2	G	2	3	1	A	2	T	2	1	5	1	3	5	1	C	A	A	G	C	1	G	C	T	1	A	T	A	C	1	3	G	1	2
F211	Bei Feng 14	MG0	N29160	20.71	22.69	A	C	1	G	G	T	A	2	T	T	2	G	2	1	1	A	2	T	2	1	5	1	3	5	1	C	A	A	G	C	1	G	C	T	1	A	T	A	C	1	3	G	1	2
F214	Ken Nong 8	MG0	N29076	17.59	23.03	A	C	1	G	G	T	A	1	T	T	2	G	2	3	1	A	2	T	1	1	1	1	1	1	1	C	A	A	G	C	1	G	C	T	2	A	T	A	C	2	2	G	1	1
F216	Ji Yu 39	MGI	N29307	16.7	22.16	A	C	1	G	G	T	G	2	T	T	1	G	1	1	2	A	1	T	1	1	4	2	1	2	2	C	A	A	G	C	1	G	C	T	1	A	T	A	C	2	2	G	1	2
F218	Ji Yu 43	MGI	N29275	14.94	21.88	A	C	1	G	G	T	A	2	T	T	1	G	2	6	1	A	2	T	1	1	3	1	5	1	1	C	A	A	G	C	1	G	C	T	1	A	T	A	C	2	1	G	1	1
F219	Ji Yu 48	MGII	N29300	18.16	22.36	A	C	1	G	G	T	A	2	T	T	1	G	1	1	1	A	2	T	1	1	2	1	1	1	1	C	A	A	G	C	1	G	C	T	1	A	T	T	C	1	1	G	1	2
F220	Ji Yu 57	MGI	N29205	15.86	23.24	A	C	1	G	G	T	A	1	T	T	2	G	2	2	2	A	1	T	1	1	5	1	1	2	1	C	A	A	G	C	1	G	C	T	1	A	T	A	C	2	5	G	1	2
F221	Ji Yu 58	MG0	N29240	20.25	22.99	A	C	1	G	G	T	A	2	T	T	1	G	1	1	2	A	1	T	1	1	5	1	1	1	1	C	A	A	G	C	1	G	C	T	1	A	T	T	C	1	2	G	1	1
F222	Ji Yu 59	MGI	N29259	17.06	21.45	A	C	2	G	G	T	A	1	T	T	1	G	1	1	2	A	1	T	1	1	2	2	1	2	1	A	A	A	G	C	1	G	C	T	2	A	T	A	C	2	1	G	2	4
F223	Ji Yu 63	MGI	N29206	19.2	21.53	A	C	1	G	G	T	G	2	T	T	1	G	1	1	1	A	4	T	1	1	3	2	1	2	1	C	A	A	G	C	1	G	C	T	1	A	T	A	C	2	2	G	1	2
F224	Ji Yu 64	MGI	N29252	17.05	22.94	A	C	1	G	G	T	A	2	T	T	2	G	2	2	2	A	2	T	1	1	1	1	1	1	1	C	A	A	G	C	1	G	C	T	2	A	T	A	C	1	2	G	1	2
F225	Ji Yu 69	MG0	N29153	19.79	22.73	A	C	1	G	G	T	A	1	T	T	1	G	1	1	1	A	1	T	1	1	1	1	3	2	1	C	A	A	G	C	1	G	C	T	1	A	T	A	C	1	1	G	4	4
F226	Jiu Nong 28	MGI	N29289	17.85	23.43	A	C	1	G	G	T	A	2	T	T	1	G	1	1	1	C	3	T	1	1	1	1	1	2	1	C	A	A	G	C	1	G	C	T	3	A	T	A	C	1	1	G	1	1
F228	Tie Feng 28	MGIII	N29337	19.95	21.48	A	C	1	G	G	T	A	1	T	T	1	G	1	1	2	A	1	T	1	1	3	1	1	2	1	C	A	A	G	C	1	G	C	T	3	A	T	A	C	1	1	G	1	2
F229	Ken Feng 22	MG0	N29085	20.54	21.95	A	C	1	G	G	T	A	2	T	T	2	G	1	7	2	A	1	T	1	1	4	1	1	4	4	C	A	A	G	C	5	G	C	T	3	A	T	T	C	1	5	G	1	5
F230	Ken Feng 13	MG0	N29136	17.51	23.71	A	C	2	G	G	T	A	2	T	T	1	G	2	2	1	A	3	T	1	1	1	1	1	3	1	C	A	A	G	C	1	G	C	T	2	A	T	A	C	3	1	G	1	1
F231	Ken Nong 5	MG0	N29189	16.95	23.44	A	C	1	G	G	T	A	1	T	T	1	G	2	3	1	A	1	T	1	3	2	1	3	3	1	C	A	A	G	C	1	G	C	T	2	A	T	A	C	1	2	G	1	2
F232	Ken Nong 23	MGI	N29229	17.33	23.14	A	C	1	G	G	T	A	1	T	T	1	G	1	1	2	A	5	T	1	1	4	1	1	2	1	C	A	A	G	C	1	G	C	T	1	A	T	A	C	2	1	G	1	1
F233	Ken Nong 24	MG0	N29122	16.7	23.16	A	C	1	G	G	T	A	1	T	T	1	G	1	1	2	A	5	T	1	1	4	1	1	2	1	C	A	A	G	C	1	G	C	T	1	A	T	A	C	2	1	G	1	1
F234	Ken Nong 26	MG0	N29150	17.65	22.05	A	C	1	G	G	T	A	1	T	T	1	G	1	1	1	A	1	T	1	1	4	1	1	2	1	C	A	A	G	C	4	G	C	T	1	A	T	A	C	3	1	G	1	1
F235	Ken Nong 28	MG0	N29092	17.66	21.96	A	C	1	G	G	T	A	2	T	T	1	G	1	1	1	A	1	T	1	1	1	1	1	2	1	C	A	A	G	C	1	G	C	T	2	A	T	A	C	1	1	G	4	3
F236	Ken Nong 29	MG0	N29083	19.33	22.4	A	C	1	G	G	T	A	1	T	T	1	G	1	1	1	A	1	T	1	1	1	1	1	2	1	C	A	A	G	C	1	G	C	T	2	A	T	A	C	1	3	A	2	3
F237	Ken Nong 30	MG0	N29078	16.53	22.85	A	C	1	G	G	T	A	1	T	T	1	G	1	1	1	A	3	T	1	1	1	1	1	2	1	C	A	A	G	C	1	G	C	T	2	A	T	A	C	1	3	G	3	3
F238	Ken Nong 31	MG0	N29195	17.13	21.9	A	C	1	G	G	T	A	2	T	T	3	G	2	4	1	A	1	T	1	1	1	1	1	2	4	C	A	A	G	C	1	G	C	T	1	A	T	A	C	1	1	G	1	1
F240	Ken Nong 34	MG0	N29080	15.08	22.83	A	C	1	T	G	T	A	2	T	T	1	G	1	1	2	A	1	T	1	1	4	1	1	2	1	C	A	A	G	C	1	G	T	T	1	A	T	A	C	1	1	G	1	1
F242	Ken Jian 7	MG0	N29225	15.48	22.51	A	C	1	G	G	T	A	1	T	T	1	G	2	2	1	A	1	T	1	1	2	1	1	2	1	C	A	A	G	C	4	G	C	T	2	A	T	A	C	1	1	G	1	1
F243	Ken Jian 35	MG0	N29144	20.3	22.38	A	C	1	G	G	T	A	1	T	C	1	G	1	1	2	A	1	T	1	1	1	1	1	2	1	C	A	A	G	C	1	G	C	T	2	A	T	A	C	1	3	G	1	1
F244	Ken Jian 38	MG00	N29048	20.21	23.7	A	C	2	G	G	T	A	1	T	T	2	G	2	2	2	A	1	T	2	1	4	1	1	3	2	C	A	A	G	C	1	G	C	T	2	A	T	T	C	3	2	G	2	3
F245	Ken Jian 43	MG0	N29159	17.35	22.69	A	C	1	G	G	T	A	1	T	T	1	G	1	1	1	A	1	T	1	1	1	1	3	3	1	C	A	A	G	C	1	G	C	T	1	A	T	A	C	1	2	G	1	2
F246	Hong Feng 11	MG0	N29129	18	21.49	A	C	1	G	G	T	A	1	T	T	1	G	1	1	1	A	1	T	1	1	1	1	1	2	1	C	A	A	G	C	1	G	C	T	2	A	T	A	C	1	3	G	4	1
F247	Bei Dou 38	MG000	N29010	20.83	22.19	A	C	1	G	G	T	A	2	T	T	1	G	1	1	1	A	1	T	1	1	4	1	1	1	1	C	A	A	G	C	1	G	C	T	1	A	T	A	C	1	2	G	1	2
F248	Liao Dou 4	MGIII	N29347	22.94	20.29	A	C	1	G	G	T	A	2	T	T	1	G	1	1	1	A	1	T	1	1	4	1	1	1	1	C	A	A	G	C	3	G	C	T	1	A	T	A	C	1	2	G	1	2
F249	Ken Jian Dou 27	MG00	N29026	19	23.56	A	C	1	G	G	T	A	1	T	T	1	G	2	2	2	A	2	T	1	1	3	1	1	2	1	C	A	A	G	C	1	G	T	T	1	A	T	A	C	1	2	G	1	2
F250	Ken Jian Dou 28	MG00	N29035	18.81	23.65	A	C	1	G	G	T	A	1	T	T	1	G	1	1	1	A	4	T	1	1	1	1	1	1	1	C	A	A	G	C	1	G	C	T	2	A	T	A	C	1	2	G	1	1
F253	Jing Shan Pu	MG0	N29191	17	22.65	A	C	1	G	G	T	A	1	T	T	1	G	1	1	2	A	3	G	1	1	2	2	1	1	1	C	A	A	G	C	1	G	C	T	1	A	T	A	C	2	1	G	6	3
F255	Dong Nong 45	MG000	N29004	17.24	22.13	A	C	1	G	G	T	A	1	T	T	1	G	1	1	1	A	3	T	1	1	6	1	3	1	1	C	A	A	G	C	1	G	C	T	1	A	T	A	C	1	2	G	2	3
F258	Sui Wu Xing 1	MG0	N29141	17.88	22.5	A	C	2	G	G	T	A	1	T	T	1	G	1	1	1	C	3	T	1	1	2	1	1	1	1	C	A	A	G	C	1	G	C	T	1	A	T	A	C	1	3	G	1	1
F260	Ji Lin 43	MGI	N29255	16.13	23.16	A	C	1	G	G	T	A	2	T	T	1	G	1	1	1	A	1	T	1	1	1	1	1	1	1	C	A	A	G	C	1	G	C	T	1	A	T	A	C	3	1	G	1	2
F261	Nen Feng 12	MG0	N29094	15.74	22.59	A	C	2	G	G	T	A	1	T	T	1	G	1	7	1	A	2	T	1	1	3	1	1	1	1	C	A	A	G	C	1	G	C	T	1	A	T	A	C	1	2	G	5	3
F267	Ji Lin 30	MGII	N29338	15.83	20.85	A	C	1	G	G	T	A	3	T	T	1	G	1	1	1	A	2	T	1	1	1	1	1	4	1	C	A	A	G	C	1	G	C	T	1	A	T	A	C	1	1	G	1	1
F268	Nen Feng 13	MG0	N29114	18.34	22.69	A	C	1	G	G	T	G	2	T	T	1	G	1	1	2	A	1	T	1	1	4	2	1	2	1	C	A	A	G	C	1	G	C	T	1	A	T	A	A	2	4	G	1	2
F270	Dong Nong 46	MG0	N29113	18.51	23.68	A	C	3	G	G	T	A	1	T	T	2	G	2	2	1	A	3	T	1	1	2	1	1	4	1	C	A	A	G	C	3	G	C	T	1	A	T	T	C	1	5	G	1	2
F271	Sui Nong 14	MG0	N29152	19.93	22.65	C	C	1	G	G	T	A	1	T	T	2	G	2	2	1	A	4	T	1	1	2	1	1	3	1	C	A	A	G	C	1	G	C	T	1	A	T	A	C	2	2	G	2	3
F273	Sui Nong 20	MG0	N29079	18.94	22.55	A	C	2	G	G	T	A	1	T	T	1	G	1	1	1	A	3	T	1	1	2	1	1	1	1	C	A	A	G	C	1	G	C	T	1	A	T	A	C	1	3	G	1	1
F275	Sui Nong 8	MG00	N29052	15.4	22.99	A	C	1	G	G	T	A	3	T	T	3	G	2	4	1	A	1	T	1	1	4	1	1	2	1	C	A	A	G	C	2	G	C	T	1	A	T	A	C	1	2	G	3	4
F276	Hei Sheng 101	MG0	N29087	16.44	23.08	A	C	1	G	G	T	A	1	T	T	1	G	1	1	1	A	1	T	1	1	1	1	1	1	1	C	A	A	G	C	1	G	C	T	2	A	T	A	C	2	1	G	1	1
F279	Yan Nong 9	MG0	N29088	19.84	22.81	A	C	1	G	G	T	A	1	T	T	1	G	1	5	2	A	1	T	1	1	1	1	1	3	1	C	A	A	G	C	1	G	T	T	1	A	T	A	C	1	2	G	4	3
F280	Zao Tie Jia Qing	MG0	N29171	18.03	23.29	A	C	1	G	G	T	A	2	T	T	1	G	1	1	2	A	1	T	1	1	1	1	1	1	1	C	A	A	G	C	1	G	C	T	1	A	T	A	C	1	1	G	1	2
F283	Bei Feng 9	MG00	N29023	17.96	23.59	A	C	1	G	G	T	A	1	T	T	1	G	2	2	1	A	2	T	1	1	3	1	1	2	1	C	A	A	G	C	1	G	T	T	1	A	T	A	C	1	2	G	1	2
F284	Mu Feng 3	MG0	N29112	16.59	23.11	A	C	1	G	G	T	A	1	T	T	2	G	2	3	1	A	1	T	1	1	1	1	3	5	1	C	A	A	G	C	1	G	C	T	1	A	T	A	C	1	3	G	1	2
F286	Bai Bao Zhu	MG0	N29097	21.98	23.2	A	C	1	G	G	T	A	1	T	T	2	G	2	2	1	A	3	T	1	1	2	2	3	4	1	C	A	A	G	C	1	G	C	T	1	A	T	T	C	1	1	G	1	1
F289	Sun Wu Da Bai Mei	MG000	N29011	16.19	22.03	A	C	1	G	G	T	G	1	T	T	1	G	1	7	1	A	1	T	1	1	1	1	3	5	1	C	A	A	G	C	1	G	C	T	1	A	T	A	C	2	1	G	1	1
F290	Zi Hua 1	MG0	N29119	17.86	23.24	A	C	3	G	G	T	A	1	T	T	2	G	2	2	1	A	3	T	1	1	1	2	2	4	1	A	A	A	G	C	1	G	C	T	1	A	T	A	C	2	1	G	1	1
F292	Kang Xian 2	MGI	N29227	16.91	22.46	A	C	1	G	G	T	A	1	T	T	1	G	1	5	1	A	2	T	1	1	2	1	1	1	1	C	A	A	G	A	1	G	T	T	1	A	T	A	C	2	2	G	3	3
F293	Kang Xian 3	MGI	N29257	16.01	22.7	A	C	1	G	G	T	A	1	T	T	1	G	1	7	1	A	5	T	1	1	2	1	1	1	1	C	A	A	G	C	1	G	T	T	1	A	T	A	C	2	2	G	6	4
F294	Kang Xian 4	MG0	N29165	19.24	23.23	A	T	1	G	G	T	A	1	T	T	1	G	1	5	1	A	1	T	1	1	2	1	1	2	1	C	A	A	G	C	1	G	T	T	1	A	T	A	C	2	2	G	1	1
F295	Hei Nong 11	MG0	N29220	17.91	23.26	A	C	1	G	G	T	A	3	T	T	1	G	1	1	2	A	4	T	1	1	2	1	2	6	1	C	A	A	G	C	1	G	C	T	2	A	T	A	C	2	3	G	1	1
F296	Hei Nong 16	MG0	N29226	16.51	23.25	A	C	1	G	G	T	A	1	T	T	2	G	2	2	1	A	2	T	1	1	3	1	1	2	1	C	C	A	G	C	1	G	T	T	1	A	T	A	C	1	1	G	2	4
F297	Hei Nong 23	MG0	N29172	17.7	22.38	A	C	2	G	G	T	A	1	T	T	2	G	2	2	1	A	2	T	1	1	3	1	1	2	1	C	A	A	G	C	1	G	T	T	1	A	T	A	C	1	1	G	4	3
F298	Hei Nong 30	MG0	N29110	17.19	23	A	C	1	G	G	T	A	1	T	T	2	G	2	2	1	A	1	T	1	1	3	1	1	2	1	C	A	A	G	C	1	G	C	T	1	A	T	T	C	1	1	G	1	2
F299	Hei Nong 31	MG0	N29115	15.74	23.18	A	C	1	G	G	T	A	1	T	T	2	G	2	2	1	C	1	T	1	1	3	1	1	2	1	C	A	A	G	C	1	G	C	T	1	A	T	T	C	1	1	A	1	2
F300	Hei Nong 32	MGI	N29261	17.45	22.53	A	C	1	G	G	T	A	1	T	T	1	G	1	1	1	A	1	T	1	1	1	1	3	2	1	C	A	A	G	C	1	G	C	T	1	A	T	A	C	1	1	G	4	4
F301	Hei Nong 33	MG0	N29224	19.01	22.38	A	C	1	G	G	T	A	3	T	T	1	G	1	1	2	A	2	T	1	1	2	1	2	6	1	C	A	A	G	C	1	G	C	T	2	A	T	A	C	2	3	G	1	1
F302	Hei Nong 35	MG0	N29086	19.56	22.39	A	C	1	G	G	T	A	3	T	T	1	G	1	1	2	A	2	T	1	1	2	1	2	1	1	C	A	A	G	C	1	G	C	T	2	A	T	A	C	2	3	G	1	1
F303	Hei Nong 40	MGI	N29251	19	22.11	A	C	2	G	G	T	A	1	T	T	2	G	2	2	1	A	1	T	1	1	2	1	2	2	1	C	A	A	G	C	1	G	C	T	2	A	T	A	C	1	1	G	1	1
F304	Si Li Huang	MGI	N29247	19.33	21.74	A	C	1	G	G	T	A	1	T	T	3	G	2	4	1	A	3	T	1	1	5	2	3	1	1	C	A	A	G	C	2	G	T	T	1	A	T	A	C	2	2	G	3	4
F305	Hei Nong 44	MG0	N29199	17.46	24.16	A	C	1	G	G	T	A	1	T	C	1	A	1	1	2	A	1	T	1	1	1	1	1	1	1	A	A	A	G	C	1	G	C	T	1	A	T	A	C	1	1	G	2	4
F306	Hei Nong 64	MG0	N29214	17.83	24.1	A	C	1	G	G	T	A	1	T	T	1	G	1	1	2	A	1	T	1	1	1	1	1	1	1	C	A	A	G	C	1	G	C	T	1	A	T	A	C	1	1	A	4	3
F307	Hei He 18	MG00	N29044	20.53	22.09	A	C	2	G	G	T	A	1	T	T	1	G	2	2	1	A	3	T	1	1	2	1	1	1	1	C	A	A	G	C	1	G	C	T	1	A	T	A	C	1	3	G	1	1
F308	Hei He 19	MG00	N29028	19.53	22.91	A	C	1	G	G	T	A	2	T	T	2	G	1	1	1	A	1	T	1	1	1	1	1	1	1	C	A	A	G	C	1	G	C	T	1	A	T	A	C	1	2	G	1	1
F309	Hei He 27	MG00	N29036	22.66	23.33	A	C	1	G	G	T	A	1	T	T	1	G	2	6	1	A	1	T	1	1	1	2	1	5	1	C	A	A	G	C	1	G	T	T	1	C	G	A	C	2	1	G	2	3
F310	Hei He 28	MG000	N29001	19.48	22.11	A	C	1	G	G	T	A	1	T	T	3	G	2	3	1	A	1	T	1	1	1	1	1	1	1	C	A	A	G	C	1	G	C	T	1	A	T	A	C	1	1	G	1	5
F311	Hei He 29	MG00	N29016	20.05	21.4	A	C	2	G	G	T	A	1	T	T	2	G	2	2	1	A	1	T	1	1	2	1	1	1	1	C	A	A	G	C	1	G	C	T	2	A	T	A	C	3	2	G	1	1
F312	Hei He 32	MG00	N29014	22.78	23.06	A	C	2	G	G	T	A	1	T	T	2	G	1	8	1	A	3	T	1	1	2	1	1	1	1	C	A	A	G	C	1	G	C	T	1	A	T	A	C	1	2	G	1	1
F313	Hei He 33	MG000	N29008	22.18	23.05	A	C	1	G	G	T	A	1	T	T	1	G	2	6	1	A	1	T	1	3	1	1	1	1	1	C	A	A	G	C	1	G	C	T	1	A	T	A	A	1	2	G	1	1
F314	Tie Feng 19	MGII	N29326	17.04	20.51	A	C	2	G	G	T	A	1	T	T	1	G	1	7	1	A	1	T	1	1	3	1	1	2	1	C	A	A	G	C	1	G	T	T	3	A	T	A	C	1	2	G	1	2
F315	Tie Feng 29	MGII	N29358	23.05	20.49	A	C	1	G	G	T	A	2	T	T	2	G	1	7	2	A	1	T	1	1	4	1	1	4	4	C	A	A	G	C	2	G	C	T	3	A	T	T	C	1	5	G	1	5
F316	Tie Feng 31	MGIII	N29359	17.48	21.5	A	C	2	G	G	T	A	1	T	T	1	G	2	3	2	A	3	T	1	1	3	1	1	2	1	A	A	A	G	C	2	G	C	T	3	A	T	T	A	2	3	G	1	1
F317	Sui Nong 3	MG0	N29127	19.26	22.94	A	C	2	G	G	T	A	3	T	T	2	G	2	6	1	A	2	T	1	1	2	1	2	1	1	C	A	A	G	C	1	G	C	T	2	A	T	A	C	1	1	G	1	1
F318	Sui Nong 4	MG0	N29183	19.28	22.75	A	C	1	G	G	T	A	1	T	T	1	G	1	1	2	A	2	T	1	1	1	1	4	3	1	C	A	A	G	C	1	G	C	T	2	A	T	A	C	2	1	G	1	1
F319	Sui Nong 6	MG0	N29120	16.51	22.88	A	C	1	G	G	T	A	1	T	T	1	G	1	1	1	A	1	T	1	1	1	1	1	1	1	C	A	A	G	C	1	G	C	T	2	A	T	A	C	1	1	G	1	1
F320	He Feng 40	MG00	N29051	17.48	23.39	A	C	1	G	G	T	A	1	T	T	2	G	2	3	1	A	1	T	1	1	1	1	1	1	1	C	A	A	G	C	1	G	C	T	1	A	T	T	C	1	1	G	1	1
F321	He Feng 42	MG00	N29056	18.13	23.53	A	C	1	G	G	T	A	2	T	T	1	G	1	1	1	A	1	T	1	1	3	1	1	1	1	C	A	A	G	C	1	G	C	T	1	A	T	A	C	2	2	G	1	1
F322	He Feng 43	MG0	N29161	16.53	23.49	A	C	2	G	G	T	A	1	T	T	1	G	1	1	1	A	1	T	1	1	2	1	1	1	1	C	A	A	G	C	4	G	C	T	1	A	T	T	C	1	2	G	1	1
F323	He Feng 45	MG0	N29176	20.85	22.59	A	C	2	G	G	T	A	1	T	T	1	G	1	1	2	A	1	T	1	1	2	1	1	1	1	C	A	A	G	C	1	G	C	T	2	A	T	A	C	3	2	G	1	1
F324	He Feng 47	MG0	N29125	20.05	23.59	A	C	1	G	G	T	A	2	T	T	1	G	1	1	1	A	3	T	1	1	1	1	1	3	1	C	A	A	G	C	1	G	C	T	2	A	T	A	C	1	1	G	1	1
F325	Meng Dou 9	MG00	N29012	20.11	22.23	A	C	1	G	G	T	A	1	T	T	1	G	1	1	1	A	2	T	1	1	2	1	2	1	1	C	A	A	G	C	1	G	C	T	1	A	T	A	C	1	3	G	1	1
F326	Liao Dou 15	MGIII	N29349	24.28	20.38	A	C	2	G	G	T	A	1	T	T	1	G	2	1	1	A	4	T	1	1	5	2	2	3	4	C	A	A	G	C	2	G	C	T	1	A	T	T	C	1	2	G	1	5
F327	Liao Dou 17	MGIII	N29350	22.09	20.23	A	C	1	G	G	T	A	2	T	T	3	G	2	4	1	A	1	T	1	1	6	2	3	3	1	C	A	A	G	C	1	G	C	T	3	A	T	T	C	1	2	G	1	5
F328	Feng Shou 2	MG0	N29130	19.65	21.33	A	C	2	G	G	T	A	1	T	T	2	G	2	2	1	A	2	T	1	1	2	2	1	1	1	C	A	A	G	C	1	G	T	T	2	A	T	A	C	1	2	G	1	1
F329	Feng Shou 6	MG0	N29081	20.36	21.71	A	C	1	G	G	T	A	1	T	T	2	G	2	2	1	A	1	T	1	1	2	2	3	1	1	C	A	A	G	C	1	G	T	T	2	A	T	A	C	1	2	G	4	4
F330	Feng Shou 10	MG0	N29050	19.4	22.6	A	C	1	G	G	T	A	1	T	T	1	G	1	1	1	C	2	T	1	1	2	1	1	4	1	C	A	A	G	C	1	G	T	T	2	A	T	A	C	1	3	G	1	2
F331	Feng Shou 12	MG0	N29091	18.46	21.95	A	C	1	G	G	T	A	2	T	T	2	G	2	2	1	A	1	T	1	2	7	1	3	1	1	C	A	A	G	C	1	G	C	T	1	A	T	A	C	2	2	G	1	1
F332	Feng Shou 17	MG00	N29032	18.68	22.91	A	C	1	G	G	T	A	1	T	T	1	G	1	1	1	A	2	T	1	1	2	1	1	4	1	C	A	A	G	C	1	G	C	T	2	A	T	A	C	1	1	G	1	2
F333	Jiu Nong 26	MGII	N29327	18.37	21.61	A	C	1	G	G	T	A	3	T	T	2	G	2	5	1	A	1	T	1	1	4	1	1	1	3	C	A	A	G	C	1	G	C	T	1	A	T	A	C	2	5	G	1	2
F334	Xiao Jin Huang 1	MGII	N29311	15.03	21.59	A	C	1	G	G	T	A	2	T	T	2	G	2	5	1	A	3	T	1	1	3	3	1	1	1	C	A	A	G	C	2	G	C	T	1	A	T	A	C	2	2	G	1	2
F335	Ji Lin 1	MGII	N29322	16.6	21.35	A	C	1	G	G	T	A	1	T	T	1	G	1	5	1	A	1	T	1	1	3	1	1	2	2	C	A	A	G	C	1	G	C	T	3	A	T	A	C	1	1	G	1	2
F336	Ji Lin 3	MGII	N29319	14.45	20.26	A	C	1	G	C	T	A	3	T	T	1	G	1	1	1	A	3	T	1	1	4	1	1	1	2	C	A	C	G	C	2	G	C	T	3	A	T	A	C	1	2	G	1	2
F337	Ji Lin 20	MGI	N29274	19.49	22.2	A	C	1	G	G	T	A	2	T	T	1	G	1	1	2	A	1	T	1	1	3	1	1	1	1	C	A	A	G	C	1	G	C	T	1	A	T	A	C	1	1	G	1	2
F338	Ji Lin 24	MGII	N29312	18.04	21.71	A	C	1	G	G	T	A	1	T	T	1	G	1	7	1	A	3	T	1	1	3	1	1	2	1	C	A	A	G	C	3	G	C	T	3	A	T	A	C	2	1	G	1	1
F339	Ji Lin 26	MGI	N29169	18.18	21.81	A	C	1	G	G	T	G	1	T	T	2	G	2	2	1	A	2	T	1	3	5	1	2	2	1	C	A	A	G	C	1	G	C	T	2	A	T	A	C	1	1	G	1	2
F340	Ji Yu 69	MG0	N29156	16.99	21.66	A	C	1	G	G	T	A	2	T	T	1	G	1	1	1	A	2	T	1	1	1	1	1	2	1	C	A	A	G	C	1	G	C	T	3	A	T	A	C	1	1	G	1	1
F341	Chang Nong 5	MGI	N29294	15.48	22.35	A	C	1	G	G	T	A	1	T	T	2	G	2	2	2	A	2	T	1	1	3	1	1	2	1	C	A	A	G	C	1	G	T	T	1	A	T	A	C	1	2	G	1	2
F342	Chang Nong 15	MGII	N29293	16.34	21.85	A	C	1	G	G	T	A	1	T	T	2	G	2	2	1	A	2	T	1	1	3	1	1	2	1	C	C	A	G	C	1	G	T	T	1	A	T	A	C	2	1	G	1	2
F343	Chang Nong 16	MGII	N29296	18.84	23.45	A	C	1	G	G	T	A	1	T	T	1	G	2	2	2	A	1	T	1	1	3	1	2	1	1	C	A	A	G	C	1	G	C	T	1	A	T	T	C	4	1	G	1	2
F344	Chang Nong 17	MGII	N29298	16.29	24.01	A	C	1	G	G	T	A	1	T	T	2	G	2	6	2	A	1	T	1	1	4	1	2	1	1	C	A	A	G	C	1	G	C	T	1	A	T	T	C	4	1	G	1	2
F345	Tong Nong 13	MGII	N29332	20.3	21.28	A	C	1	G	G	T	A	1	T	T	1	G	1	5	1	A	3	T	1	1	2	1	3	1	1	C	A	A	G	C	1	G	C	T	1	A	T	A	C	1	4	G	1	2
F346	Ken Feng 5	MG0	N29207	17.93	22.2	A	C	1	T	G	T	A	1	T	T	1	G	1	1	1	A	1	T	1	1	1	1	1	3	1	C	A	A	G	C	1	G	C	T	2	A	T	A	C	1	1	G	4	4
F347	Ken Feng 7	MG0	N29069	16.43	22.76	A	C	1	G	G	T	A	2	T	T	1	G	1	1	2	A	1	T	1	1	1	1	1	1	1	C	A	A	G	C	1	G	C	T	1	A	T	A	C	1	1	G	1	2
F348	Ken Feng 9	MGI	N29236	17.28	22.86	A	C	1	G	G	T	A	2	T	T	1	G	1	1	2	A	3	T	1	1	2	1	1	3	1	C	A	A	G	C	1	G	C	T	2	A	T	A	C	3	1	G	1	1
F349	Ken Feng 11	MG0	N29194	17.91	23.31	A	C	1	G	G	T	A	2	T	T	1	G	1	1	1	A	1	T	1	1	1	1	1	1	1	C	A	A	G	C	1	G	C	T	1	A	T	A	A	1	1	G	1	2
F350	Ji Nong 15	MGII	N29313	18.99	22.53	A	C	1	G	G	T	G	2	T	T	1	G	1	1	1	A	3	T	1	1	4	1	1	2	1	C	A	A	G	C	1	G	C	T	1	A	T	A	C	1	6	G	1	2
F351	Hei Nong 10	MG0	N29133	15.64	24.09	A	C	1	G	G	T	A	1	G	T	2	G	2	2	1	A	2	T	1	1	3	1	1	2	1	C	A	A	G	C	1	G	T	T	1	A	T	A	C	1	1	G	4	3
F352	Hei Nong 26	MGI	N29184	17.08	22.53	A	C	1	G	G	T	A	1	T	T	1	G	1	1	1	A	1	T	1	1	2	1	1	1	1	C	A	A	G	C	1	G	T	T	1	A	T	A	C	1	1	G	1	1
F353	Dong Nong 4	MG0	N29187	16.89	23.16	A	C	1	G	G	T	A	1	T	T	2	G	2	2	1	A	2	T	1	1	3	1	1	2	1	C	A	A	G	C	1	G	C	T	1	A	T	A	C	1	1	A	5	4
F354	Nen Feng 9	MG0	N29108	18.84	23.28	A	C	1	G	G	T	A	1	T	T	1	G	1	2	1	A	2	T	1	1	2	1	1	1	1	C	A	A	G	C	2	G	T	T	1	A	T	A	C	1	2	G	2	4
F355	Ji Lin 5	MGIII	N29344	17.86	20.74	A	C	1	G	G	T	A	3	T	T	1	G	1	1	1	A	1	T	1	1	4	1	1	2	1	C	A	A	G	C	2	G	C	T	1	A	T	A	C	1	5	G	1	2
F356	Ji Ti 3	MGII	N29314	19.6	20.78	A	C	2	G	G	T	A	2	T	T	4	G	1	1	1	A	1	T	1	2	6	1	1	1	1	C	A	A	G	C	1	G	C	T	1	A	T	A	C	2	5	G	1	2
F357	Jiu Nong 9	MGII	N29297	16.7	21.75	A	C	1	G	G	T	A	3	T	T	1	G	1	1	1	A	3	T	1	1	5	1	1	2	1	C	A	A	G	C	2	G	C	T	1	A	T	A	C	1	2	G	1	2
F358	Tie Feng 3	MGII	N29308	16.75	20.4	A	C	2	G	G	T	A	1	T	T	1	G	1	5	1	A	1	T	1	1	3	1	1	2	1	C	A	A	G	C	1	G	C	T	3	A	T	A	C	1	2	G	1	2
F359	Hei Nong 28	MG0	N29096	16.16	22.7	C	C	1	G	G	T	A	1	T	T	3	G	2	4	1	A	1	T	1	2	7	1	3	1	1	C	A	A	G	C	1	G	C	T	1	A	T	A	C	1	2	G	6	3
F360	Hei He 20	MG0	N29116	14.04	22.98	A	C	1	G	G	T	A	1	T	T	1	G	1	1	1	A	1	T	1	1	1	3	4	1	1	C	A	A	G	C	1	G	C	T	1	A	T	A	C	1	1	G	1	2
F361	Ken Jian Dou 26	MG0	N29212	18.28	23.41	A	C	1	G	G	T	A	1	T	T	1	G	1	1	1	A	1	T	1	1	1	1	4	3	1	C	A	A	G	C	1	G	C	T	1	A	T	T	C	2	2	G	1	1
F362	Jiu Nong 29	MGI	N29201	16	21.99	A	C	1	G	G	T	G	1	T	T	1	G	1	1	1	A	1	T	1	1	4	1	1	2	1	C	A	A	G	C	1	G	C	T	2	A	T	A	C	1	2	G	1	2
F364	Sui Nong 15	MG0	N29082	19.89	22.98	A	C	1	G	G	T	A	1	G	T	1	G	1	1	2	A	1	T	1	1	2	1	5	1	1	C	A	A	G	C	1	G	C	T	2	A	T	A	C	3	1	G	1	1
F365	Ji Yu 47	MGI	N29271	19.26	21.85	A	C	1	G	G	T	A	2	T	T	1	G	1	1	2	A	1	T	1	2	1	1	1	1	1	C	A	A	G	C	1	G	C	T	1	A	T	A	C	1	2	G	1	2
F366	Sui Nong 10	MG0	N29178	16.71	20.74	A	C	2	G	G	T	A	1	T	T	2	G	2	2	2	A	1	T	1	1	2	1	1	3	1	C	A	A	G	C	1	G	C	T	2	A	T	T	C	3	2	G	1	2
F367	Meng Dou 5	MG00	N29040	19.76	22.03	A	C	1	G	G	T	G	1	T	T	1	G	1	7	1	A	1	T	1	2	7	1	3	5	1	C	A	A	G	C	1	G	C	T	1	A	T	A	C	2	4	G	1	1
F368	Ji Yu 35	MGI	N29272	16.78	22.53	A	C	1	G	G	T	A	1	T	T	1	G	2	2	2	A	1	T	1	1	3	1	1	1	1	C	A	A	G	C	1	G	C	T	3	A	T	A	C	1	1	G	1	1
F370	Mu Feng 7	MGI	N29237	17.48	22.21	A	C	1	G	G	T	A	2	T	T	1	G	1	1	1	A	1	T	1	1	1	1	2	3	1	C	A	A	G	C	1	G	C	T	1	A	T	A	C	1	1	G	1	2
F371	Mu Dou 8	MGI	N29250	17.64	22.66	A	C	1	G	G	T	A	2	T	T	1	G	1	1	1	A	1	T	1	1	1	3	1	1	1	C	A	A	G	C	1	G	T	T	1	A	T	A	C	2	3	G	1	2
F372	Sui Nong 29	MGI	N29239	19.78	22.63	A	C	1	G	G	T	A	2	T	T	1	G	1	1	1	A	1	T	1	1	1	1	1	1	1	C	A	A	G	C	1	G	C	T	2	A	T	A	C	1	2	G	1	2
F373	Sui Nong 30	MG0	N29182	19.74	22.7	A	C	1	G	G	T	A	1	T	T	2	G	1	1	1	A	6	T	1	1	1	1	1	1	1	C	A	A	G	C	1	G	C	T	2	A	T	A	C	1	1	A	1	1
F374	Sui Nong 31	MG0	N29231	17.84	23.03	A	C	2	G	G	T	A	1	T	T	1	G	2	2	1	A	1	T	1	1	1	1	1	2	1	C	A	A	G	C	1	G	C	T	1	A	T	T	C	2	1	G	1	1
F375	Sui Nong 32	MG0	N29202	18.4	22.96	A	C	1	G	G	T	A	1	T	T	1	G	1	1	2	A	1	T	1	1	1	1	1	1	1	C	A	A	G	C	1	G	C	T	2	A	T	A	C	1	1	G	1	1
F376	Dong Sheng 1	MG00	N29077	17.88	22.8	A	C	1	G	G	T	A	2	T	T	2	G	2	3	1	A	2	T	1	1	5	1	1	1	1	C	A	A	G	C	1	G	C	T	1	A	T	A	C	1	2	G	1	2
F377	Nen Feng 20	MGI	N29238	17.35	22.08	A	C	1	G	G	T	A	2	T	T	1	G	1	2	1	A	2	T	1	1	1	1	1	2	1	C	A	A	G	C	1	G	C	T	1	A	T	A	C	1	2	G	1	2
F378	Sui Nong 22	MG0	N29209	19.38	22.93	A	C	1	G	G	T	A	1	T	T	1	G	1	1	2	A	1	T	1	1	2	1	1	1	1	C	A	A	G	C	1	G	C	T	1	A	T	A	C	1	1	G	1	1
F379	Feng Shou 27	MG0	N29198	18.08	23.28	A	C	1	G	G	T	A	3	T	T	1	G	1	1	1	A	1	T	1	1	1	1	1	1	1	C	A	A	G	C	1	G	C	T	2	A	T	A	C	3	2	A	1	1
F380	Ke Shan 1	MG00	N29046	19.66	22.58	A	C	1	G	G	T	A	1	T	T	1	G	2	2	1	A	1	T	1	1	1	1	1	1	1	C	A	A	G	C	1	G	C	T	1	A	T	A	C	1	3	G	1	1
F381	Tong Hua Ping Ding Xiang	MGIII	N29346	19.24	19.21	A	C	3	G	G	T	A	1	T	T	1	G	1	1	1	A	3	T	1	1	6	1	1	4	1	C	A	A	G	C	3	G	C	T	1	A	T	T	C	2	5	G	1	2
F382	Ken Feng 20	MG0	N29099	19.44	22.26	A	C	1	G	G	T	A	2	T	T	1	G	1	1	1	A	1	T	1	1	1	1	1	3	1	C	A	A	G	C	1	G	C	T	1	A	T	A	C	1	1	G	1	2
F383	Ken Dou 30	MG0	N29197	16.98	22.13	A	C	1	G	G	T	A	1	T	T	1	G	1	1	2	A	2	T	1	1	1	1	4	3	1	C	A	A	G	C	1	G	C	T	2	A	T	A	C	2	3	G	1	2
F384	Si Li Huang	MG0	N29279	16.46	21.95	A	C	1	G	G	T	A	1	T	T	2	G	2	2	1	A	1	G	1	1	3	1	1	1	1	C	A	A	G	C	1	G	T	T	2	A	T	A	C	1	2	G	2	3
F385	Huang Bao Zhu	MGII	N29317	16.56	22.75	A	C	1	G	G	T	A	1	T	T	1	G	1	5	1	A	3	T	1	1	3	1	1	1	1	C	A	A	G	C	1	G	T	T	1	A	T	A	C	2	2	G	1	2
F386	Ji Yu 83	MG0	N29100	19.34	24.54	A	C	1	G	G	T	A	1	T	C	2	G	2	2	1	A	2	T	1	1	2	1	1	3	1	C	A	A	G	C	1	G	C	T	2	A	T	A	C	2	2	G	2	3
F387	Ji Yu 86	MG0	N29328	18.51	22.91	A	C	1	G	G	T	A	2	T	T	3	G	2	1	2	A	1	T	1	1	2	1	1	1	1	A	A	A	G	C	1	G	C	T	3	A	T	A	C	1	1	G	1	5
F388	Ji Yu 75	MGII	N29333	18.54	21.95	A	C	1	G	G	T	G	2	T	T	1	G	1	1	1	A	1	T	1	1	4	2	1	2	1	C	A	A	G	C	1	G	C	T	1	A	T	A	C	1	2	G	1	2
F389	He Feng 56	MG0	N29162	17.39	22.45	A	C	1	G	G	T	A	1	T	T	1	G	1	1	2	A	2	T	1	1	1	1	4	1	1	C	A	A	G	C	1	G	C	T	2	A	T	A	C	2	1	G	1	1
F390	Jiu Nong 33	MGIII	N29329	17.43	21.83	A	C	1	G	G	T	A	1	T	T	1	G	1	1	1	A	2	T	1	1	4	2	1	2	3	C	A	A	G	C	1	G	C	T	1	A	T	A	C	2	4	G	1	2
F391	Jiu Nong 31	MGI	N29286	16.86	22.35	A	C	1	G	G	T	G	2	T	T	1	G	1	1	2	A	1	T	1	1	1	2	5	1	1	C	A	A	G	C	1	G	C	T	1	A	T	A	C	1	2	A	1	2
F392	Ji Ke 3	MGI	N29282	18.75	22.8	A	C	1	G	G	T	A	1	T	T	1	G	1	1	1	A	5	T	1	1	3	1	1	3	1	C	A	A	G	C	1	G	C	T	1	A	T	A	C	1	1	G	1	2
F393	Ji Yu 34	MGI	N29304	17.44	22.71	A	C	2	G	G	T	A	1	T	T	1	G	1	1	1	A	6	G	1	1	3	1	1	1	3	C	A	A	G	C	1	G	C	T	3	A	T	A	C	1	5	G	1	2
F394	Jiu Nong 34	MGII	N29342	14.65	21.89	A	C	2	G	G	T	A	3	T	T	1	G	1	1	2	A	1	T	1	1	3	1	1	3	1	C	A	A	G	C	1	G	C	T	3	A	T	A	C	1	5	G	1	2
F396	Jiu Nong 30	MGII	N29305	18.03	21.16	A	C	1	G	G	T	A	2	T	T	1	G	1	1	2	A	1	T	1	1	1	2	1	2	2	C	A	A	G	C	1	G	C	T	1	A	T	A	C	1	2	G	1	2
F397	Ji Ke 1	MGI	N29246	20.03	23.06	A	C	1	G	G	T	A	1	T	T	2	G	2	2	2	A	2	T	1	1	1	1	1	2	1	C	A	A	G	C	1	G	T	T	1	A	T	T	C	2	1	G	1	1
F398	Za Jiao Dou 3	MG0	N29301	18.06	21.88	A	C	1	G	G	T	A	1	T	T	1	G	1	1	1	A	6	T	1	1	1	1	1	1	1	C	A	A	G	C	1	G	C	T	2	A	T	A	C	2	6	G	1	1
F399	Kang Xian 9	MGI	N29265	19.41	23.3	A	C	1	G	G	T	G	1	T	T	1	G	1	1	1	A	6	T	1	1	1	1	1	1	1	C	A	A	G	C	5	G	C	T	1	A	T	A	C	2	2	G	1	1
F400	Hei He 43	MG00	N29031	20.36	22.85	A	C	1	G	G	T	A	1	T	T	2	G	2	3	1	A	1	T	1	1	1	1	1	1	1	C	A	A	G	C	1	G	C	T	1	A	T	A	C	1	3	G	1	1
F401	Sui Nong 26	MG0	N29223	20.36	22.18	A	T	1	G	G	T	G	1	T	T	1	G	1	1	2	A	1	T	1	1	1	1	1	3	1	C	A	A	G	C	1	G	C	T	1	A	T	A	C	3	1	G	1	1
F402	Hei Nong 67	MGI	N29253	19.98	22.86	A	C	2	G	G	T	A	1	T	C	1	G	1	5	1	A	2	T	1	1	3	1	4	3	1	C	A	A	G	C	1	G	C	T	3	A	T	A	C	1	1	G	1	1
F404	Hei Nong 65	MG0	N29215	16.93	22.21	A	C	1	G	G	T	A	2	T	T	2	G	2	3	1	A	1	T	1	1	1	1	1	1	1	C	A	A	G	C	1	G	C	T	1	A	T	A	C	1	3	G	1	2
F405	Bei Dou 8	MG0	N29135	18.1	22.4	A	C	1	G	G	T	A	2	T	T	1	G	1	1	1	C	1	T	1	1	1	1	1	1	1	C	A	A	G	C	1	G	C	T	1	A	T	A	C	1	2	G	1	2
F406	Sui Nong 27	MG0	N29155	24.15	22.6	A	C	1	G	G	T	A	2	T	T	1	G	1	1	1	A	1	T	1	1	1	1	2	1	1	C	A	A	G	C	1	G	C	T	1	A	G	A	C	1	1	G	1	2
F407	Ha Bei 46-1	MG0	N29057	19.18	22.75	A	C	1	G	G	T	A	2	T	T	2	G	2	3	1	A	1	T	1	1	1	1	1	1	1	C	A	A	G	C	1	G	C	C	1	A	T	A	C	1	3	G	1	2
F408	He Feng 30	MG0	N29107	17.28	21.89	A	C	1	G	G	T	A	1	T	T	1	G	1	1	1	A	3	T	1	1	6	1	3	1	1	C	A	A	G	C	1	G	C	T	1	A	T	A	C	1	2	G	3	3
F409	Meng Dou 6	MG00	N29045	10.99	21.26	A	C	1	T	G	T	A	3	T	T	2	G	2	6	2	A	1	T	2	1	2	1	4	3	1	C	A	A	G	C	1	G	C	T	1	A	T	A	C	2	2	G	1	1
F410	Hei Nong 43	MG0	N29196	20.69	21.6	A	C	1	G	G	T	A	2	T	T	1	G	1	1	1	A	1	T	1	1	1	1	1	3	1	C	A	A	G	C	1	G	C	T	1	A	T	A	C	2	1	G	1	2
F411	Tie Jia Zi	MGII	N29302	17.74	20.94	A	C	1	G	G	T	A	2	T	T	3	G	2	1	1	A	1	G	1	1	4	1	1	2	1	C	A	A	G	C	2	G	C	T	3	A	T	T	C	2	5	G	6	4
F412	Tian E Dan	MGI	N29316	16.59	21.7	A	C	2	G	G	T	A	1	T	T	1	G	2	6	1	A	3	T	1	1	3	1	1	1	1	C	A	A	G	C	1	G	C	T	3	A	T	A	C	1	1	A	1	1
F413	Ji Yu 85	MGI	N29276	17.16	21.56	A	C	2	G	G	T	A	1	T	T	1	G	2	2	1	A	3	T	1	1	2	1	3	1	1	C	A	A	G	C	1	G	C	T	1	A	T	T	C	4	2	G	1	1
F414	He Feng 46	MG0	N29090	20.2	22.74	A	C	1	G	G	T	A	2	T	T	1	G	1	1	1	A	3	T	1	1	1	1	1	3	1	C	A	A	G	C	1	G	C	T	2	A	T	A	C	1	1	G	1	1
F415	Bei Dou 5	MG00	N29039	19.18	23.05	A	C	1	G	G	T	A	1	T	T	1	G	1	1	1	A	2	T	1	1	2	1	1	4	1	C	A	A	G	C	1	G	C	T	2	A	T	A	C	1	2	G	1	2
P001	Hei He 48	MG00	N29058	21.3	21.59	A	C	1	G	G	A	A	1	T	T	1	G	2	6	1	A	1	T	1	1	1	1	1	1	1	C	A	A	G	C	1	G	C	T	1	A	T	A	C	1	6	G	1	2
P004	Hei He 36	MG0	N29072	23.83	22.26	A	C	1	G	G	T	A	2	T	T	1	G	1	1	1	A	3	T	1	1	1	1	1	1	1	C	A	A	G	C	1	G	C	T	1	A	T	A	C	1	3	G	1	2
P025	Feng Shou 24	MG000	N29003	18.7	23.1	A	C	2	G	G	T	A	1	T	T	2	G	2	2	1	A	3	T	1	1	2	1	2	1	1	C	A	A	G	C	1	G	C	T	2	A	T	A	C	1	3	G	1	1
P039	Bei Jiang 2	MG00	N29053	17.65	23.15	A	C	1	G	G	T	A	1	T	T	2	G	2	1	1	A	1	T	1	1	1	1	3	1	1	C	A	A	G	C	1	G	C	T	1	A	T	A	C	1	2	G	1	1
P055	Huang Jiang 2	MG000	N29018	19.4	22.56	A	C	1	G	G	T	A	1	T	T	1	G	2	2	1	A	2	T	1	1	1	1	1	1	1	C	A	A	G	C	1	G	C	T	1	A	T	A	C	2	3	G	1	1
P076	Kang Xian 6	MGI	N29230	19.81	23.46	A	C	1	G	G	T	A	1	T	T	1	G	1	7	2	A	1	T	1	1	2	1	1	1	1	C	A	A	G	C	1	G	C	T	1	A	T	A	C	2	2	G	5	4
P085	Bei Feng 11	MG0	N29145	23.59	21.89	A	C	1	G	G	T	A	2	T	T	1	G	1	1	2	A	3	T	1	1	2	1	2	1	1	C	C	A	G	C	1	G	C	T	1	A	T	A	C	2	2	G	3	3
P087	Kang Xian 8	MGI	N29248	21.84	23.7	A	C	1	G	G	T	A	1	G	T	1	G	1	7	1	A	2	T	1	1	2	1	1	1	1	C	A	A	G	C	1	G	T	T	1	A	T	A	C	2	2	G	6	3
P096	Meng Dou 36	MG00	N29061	18.44	22.9	A	C	1	G	G	T	A	2	T	T	1	G	1	1	1	A	1	T	1	1	1	1	1	1	1	C	A	A	G	C	1	G	C	T	1	A	T	A	C	1	2	G	1	1
P145	Sui Nong 33	MGI	N29200	20	22.24	A	C	1	G	G	T	A	1	T	T	1	G	1	1	2	A	1	T	1	1	1	1	1	1	1	C	A	A	G	C	1	G	C	T	2	A	T	A	C	1	2	G	1	1
P150	Sui Nong 34	MG0	N29219	18.43	22.71	A	C	1	G	G	T	A	1	T	T	1	G	1	1	1	A	1	T	1	1	1	1	3	2	1	C	A	A	G	C	1	G	C	T	1	A	T	A	C	1	1	G	4	4
P154	He Nong 60	MG0	N29151	20.41	23.29	A	C	1	G	G	T	A	1	T	T	1	G	1	1	2	A	2	T	1	1	4	1	1	3	1	C	A	A	G	C	1	G	C	T	1	A	T	A	C	2	1	G	1	1
P157	Sui Nong 35	MG0	N29213	21.31	23.05	A	C	2	G	G	T	A	1	T	T	2	G	2	2	1	A	1	T	1	1	1	1	1	3	1	C	A	A	G	C	1	G	C	C	1	A	G	A	C	1	1	G	1	2
P183	Kang Xian 7	MGI	N29291	18.05	22.16	A	C	1	G	G	T	A	1	T	T	1	G	1	5	1	A	1	T	1	1	1	1	1	1	1	C	A	A	G	C	1	G	C	T	1	A	T	A	C	2	3	G	1	2
P188	Nen Feng 4	MG0	N29154	23.13	21.79	A	T	1	G	G	T	A	2	T	T	1	G	1	1	1	A	3	T	1	1	2	1	2	1	1	C	A	A	G	C	1	G	C	T	1	A	T	A	C	2	1	G	4	4
P230	Hei Nong 69	MGI	N29277	15.4	23.1	A	C	1	G	G	T	A	2	T	T	1	G	1	1	1	A	1	T	1	1	1	1	1	1	1	C	A	A	G	C	1	G	C	T	2	A	T	A	C	1	1	G	2	3
P257	Hei Nong 41	MG0	N29158	18.39	22.88	A	C	1	G	G	T	A	3	T	T	1	G	1	1	1	A	2	T	1	1	2	1	2	1	1	C	A	A	G	C	1	G	T	T	2	A	T	A	C	2	3	G	1	1
P319	Jiu Nong 36	MGII	N29341	16.74	22.1	A	C	1	G	G	T	A	2	T	T	1	G	1	4	2	A	1	T	1	1	3	1	1	1	1	C	A	A	G	C	1	G	C	T	1	A	T	T	C	1	1	G	1	2
P331	Ji Yu 71	MGII	N29334	18.49	22.31	A	C	1	G	G	T	A	2	T	T	1	G	1	8	1	A	1	T	1	2	3	1	3	1	1	C	A	A	G	C	1	G	C	T	1	A	T	A	C	1	1	G	1	2
P338	Jiu Nong 39	MGIII	N29335	13.97	22.19	A	C	1	G	G	T	A	1	G	T	1	G	1	1	1	A	3	T	1	1	3	1	1	2	1	C	A	A	G	C	1	G	C	T	1	A	T	A	C	4	1	G	1	2
P345	Ji Lin 48	MG0	N29166	22.86	21.74	A	C	1	G	G	T	A	2	T	T	1	G	1	1	1	A	3	T	1	1	2	1	2	1	1	C	A	A	G	C	1	G	C	T	1	A	T	A	C	2	1	G	4	3
[truncated: 126 more columns]
